# Supplementary material for: Glial Nrf2 signaling mediates the neuroprotection exerted by Gastrodia elata Blume in Lrrk2-G2019S Parkinson’s disease
Source: eLife journal article supplement (doi:10.7554/elife.73753), 2021-11-15

Fig. 3A

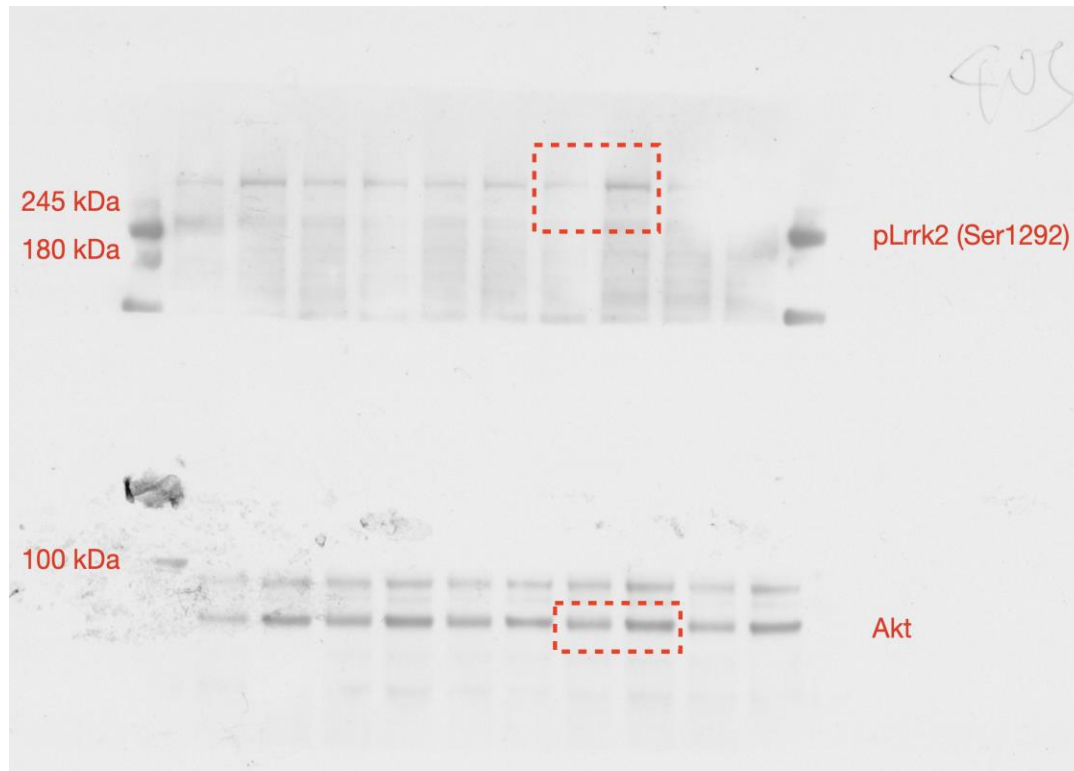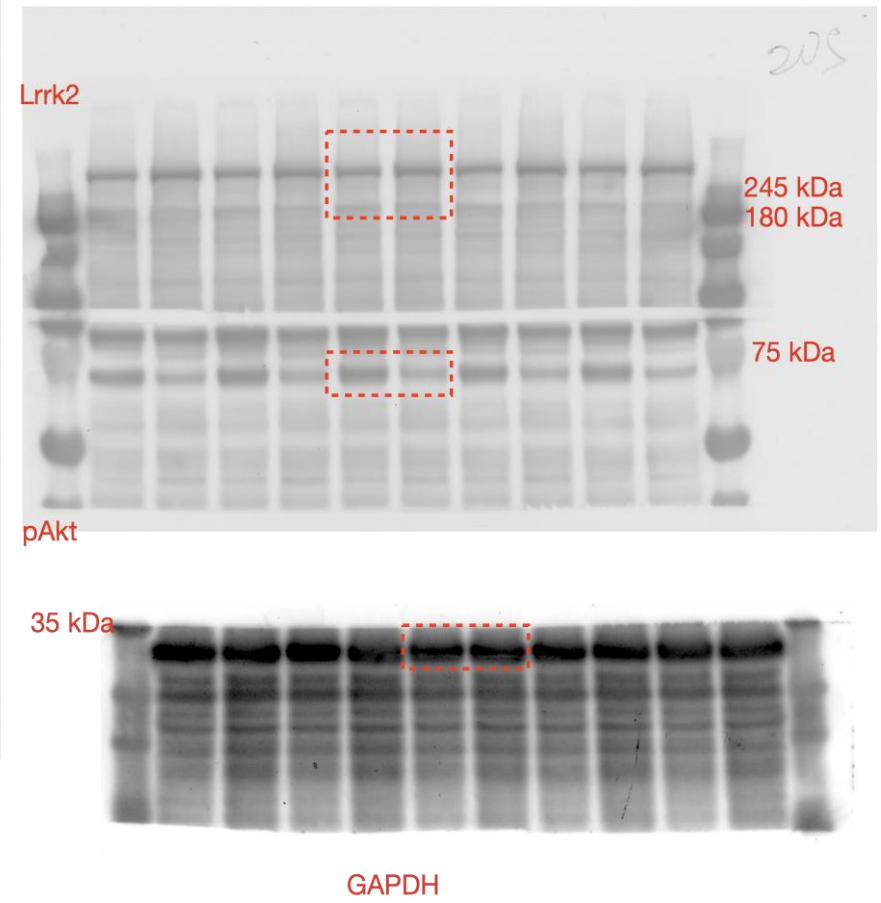

Fig. 3D

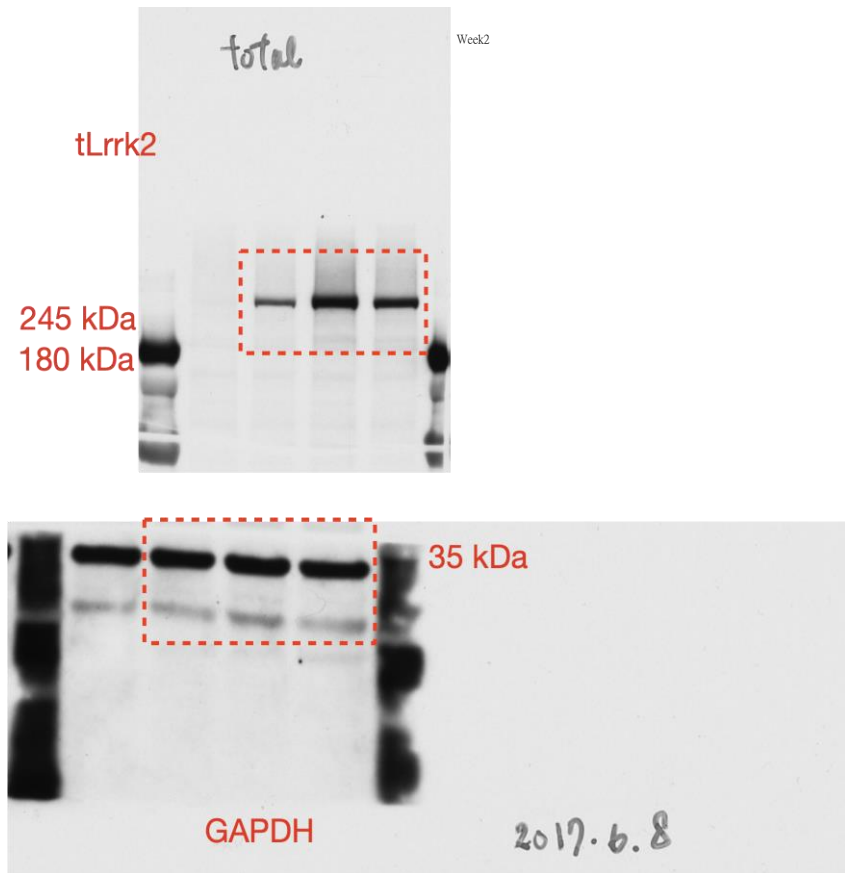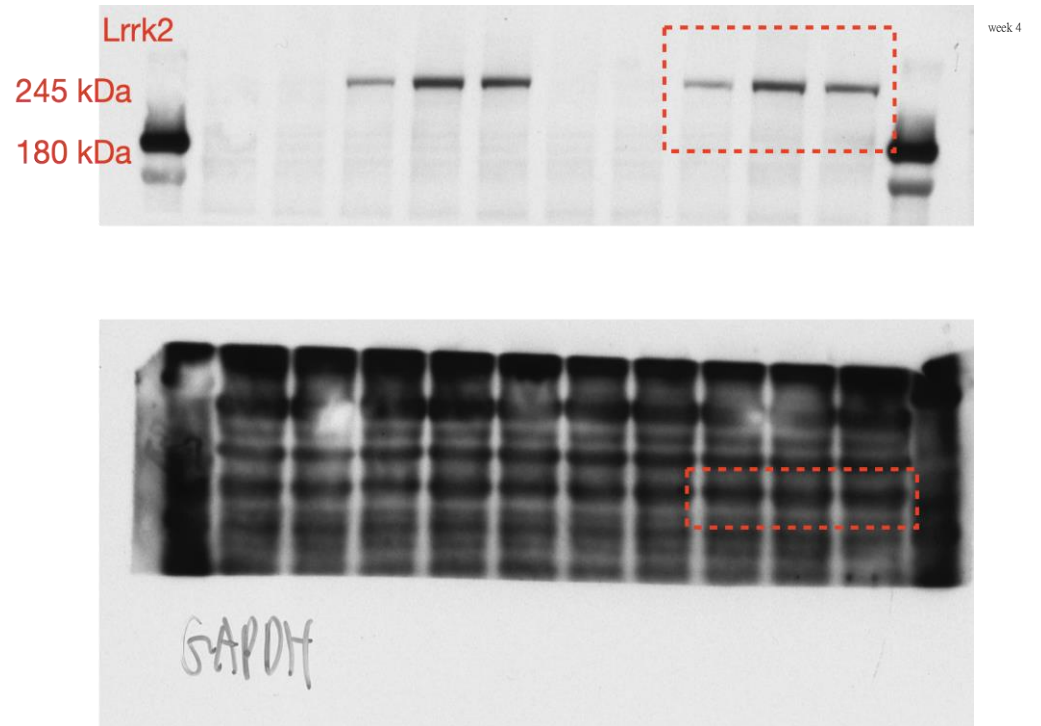

Fig. 3F

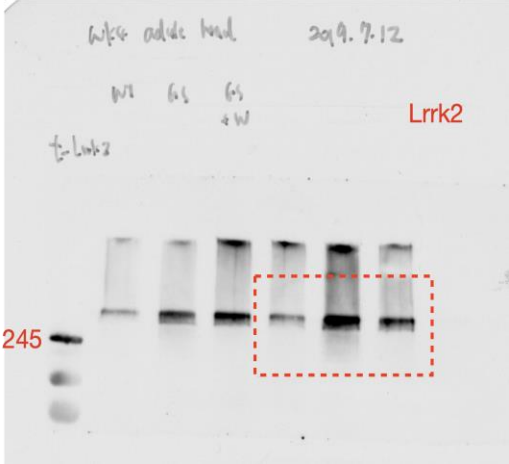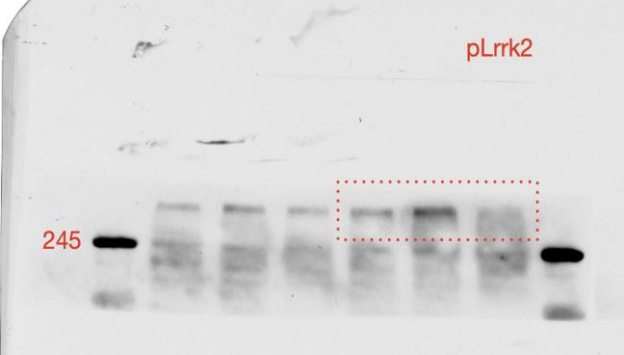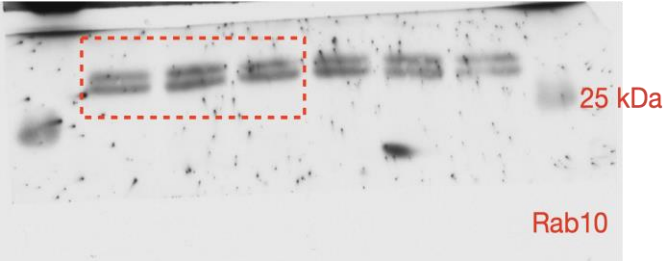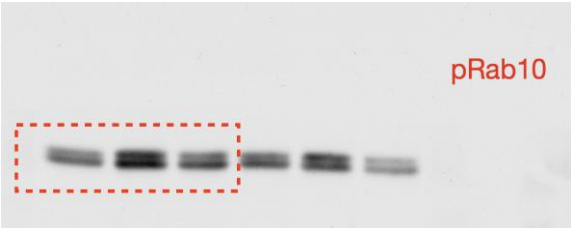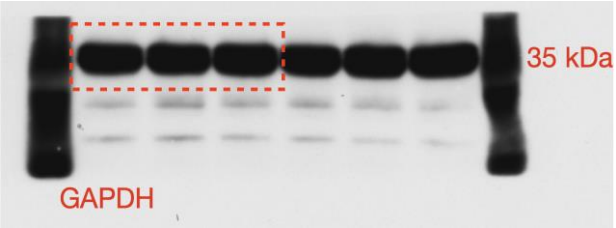

Fig. 4A

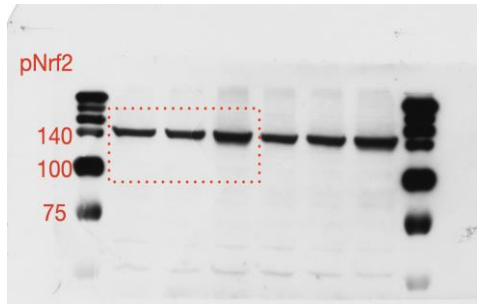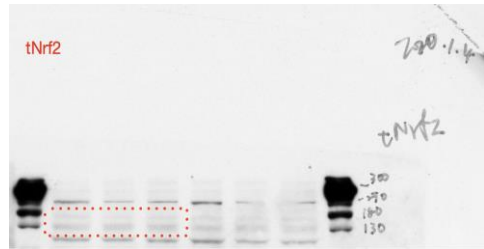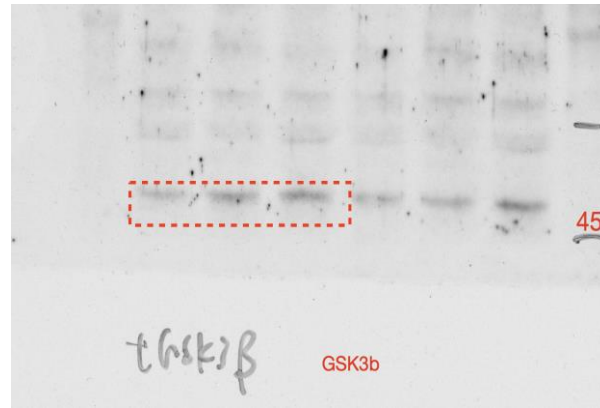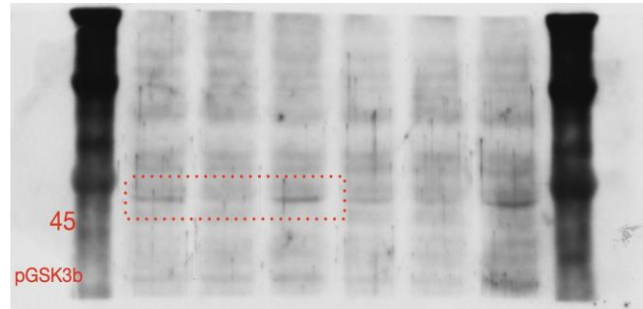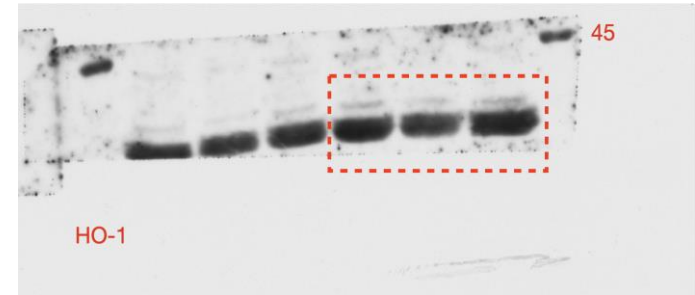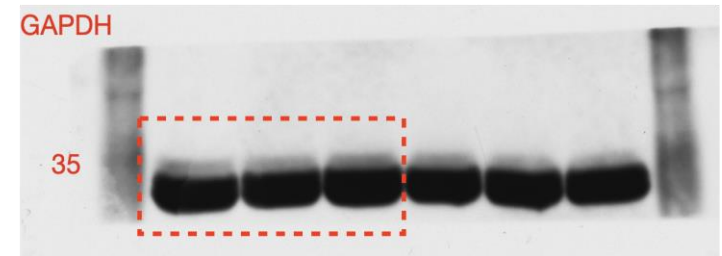

Fig. 4C

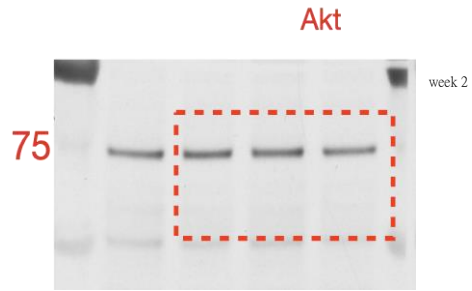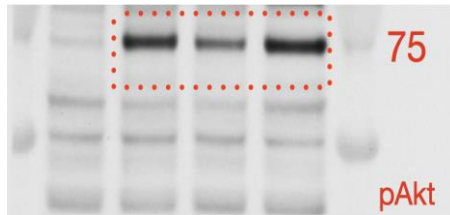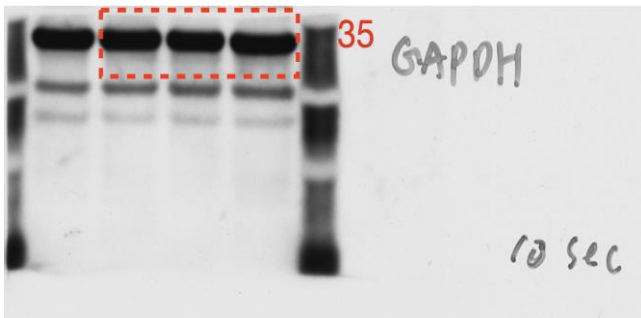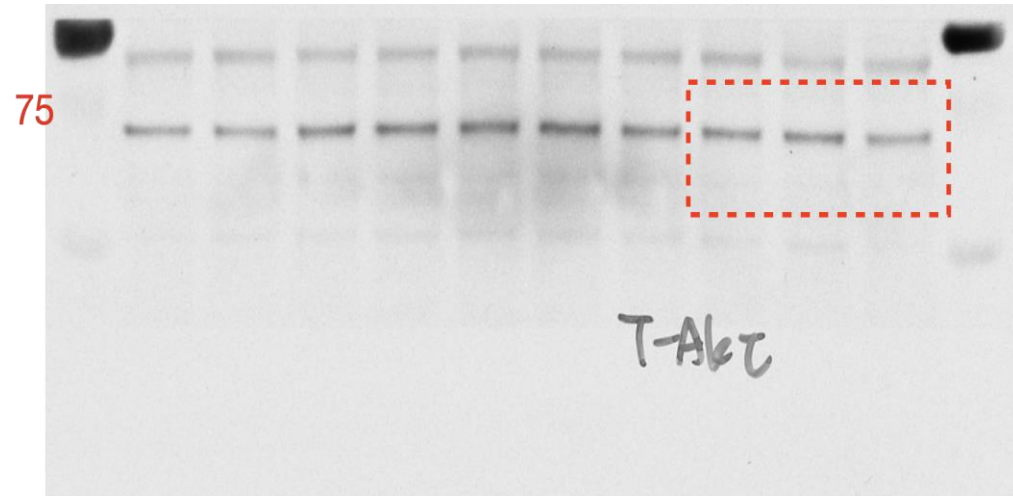

week 4

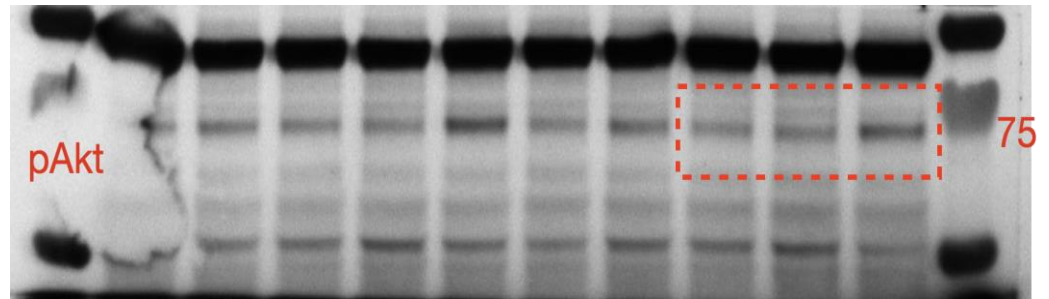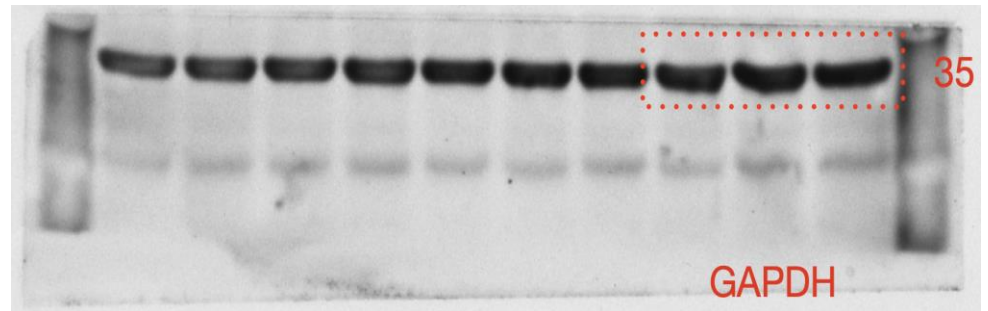

Fig. 10E

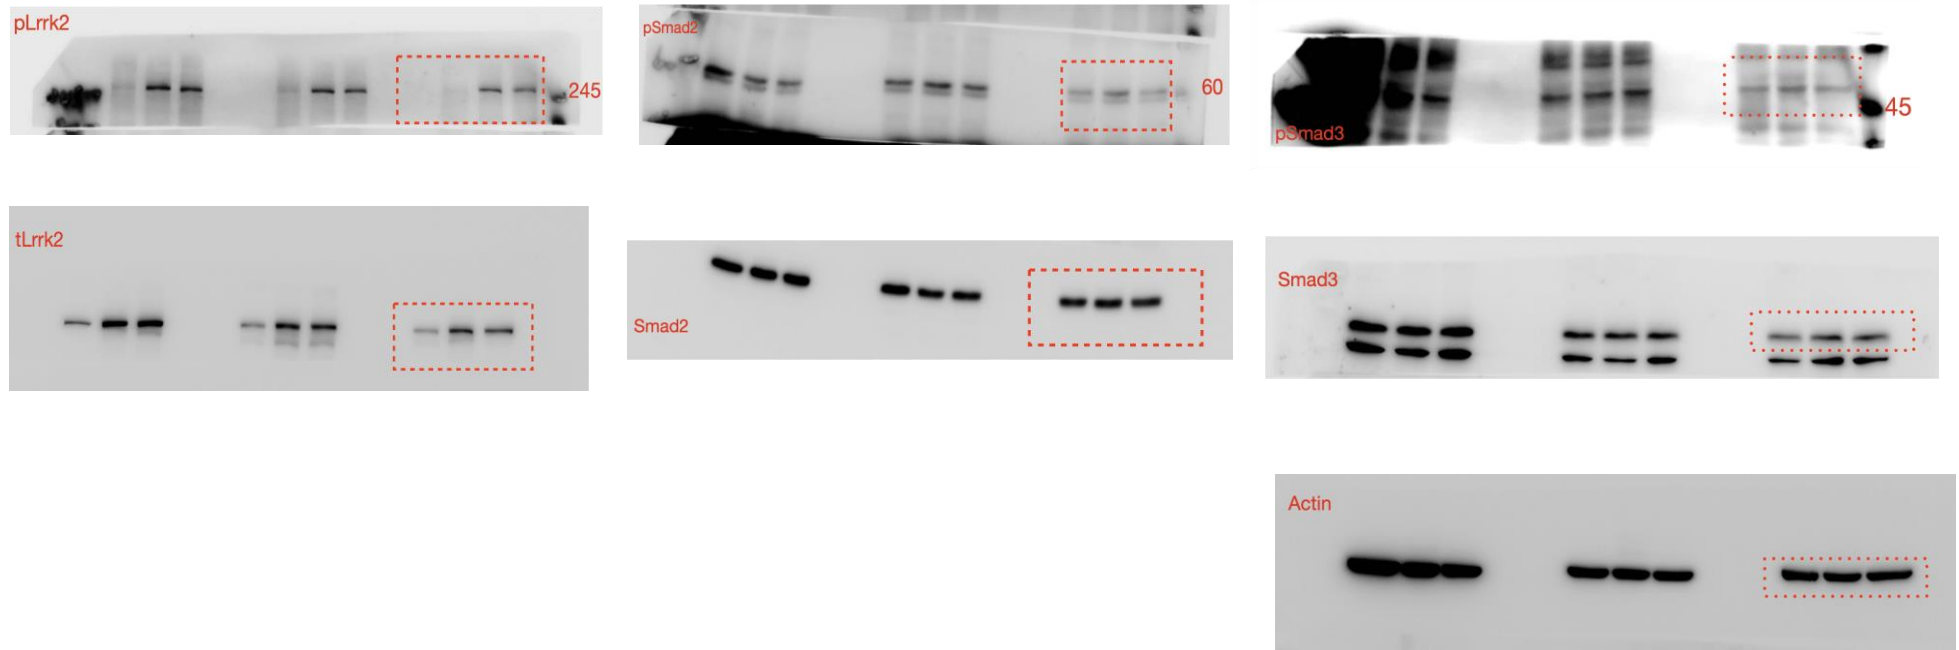

Figure 3-figure supplement 1A

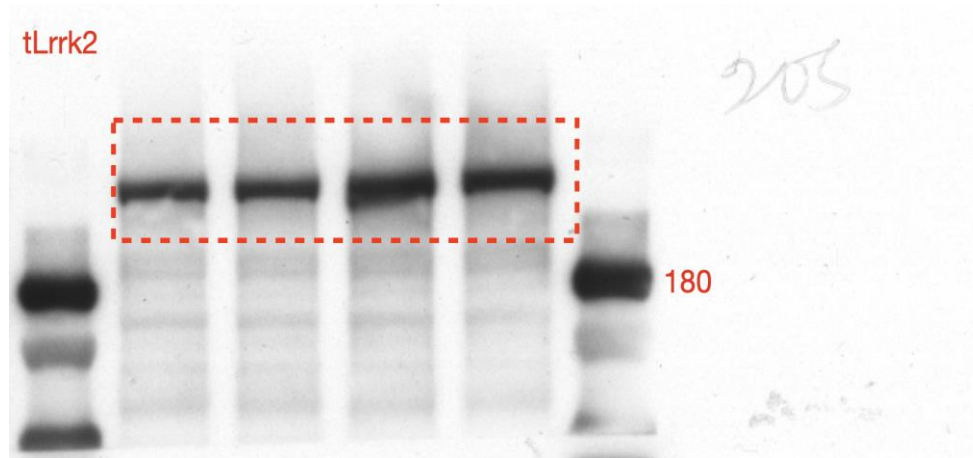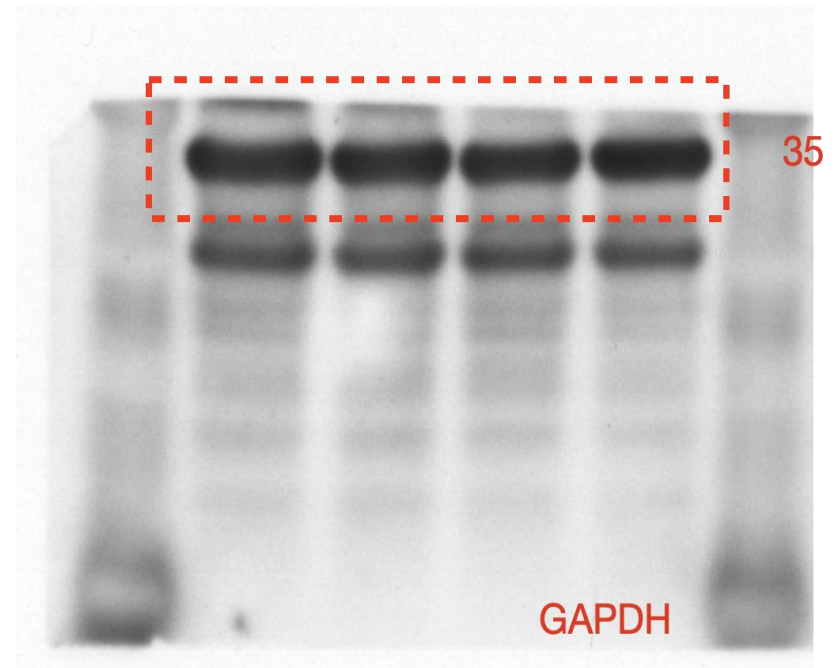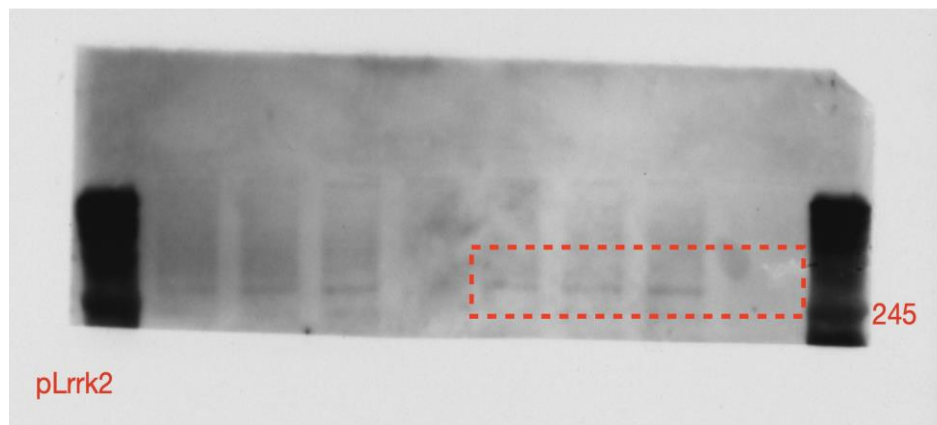

Figure 6-figure supplement 1A

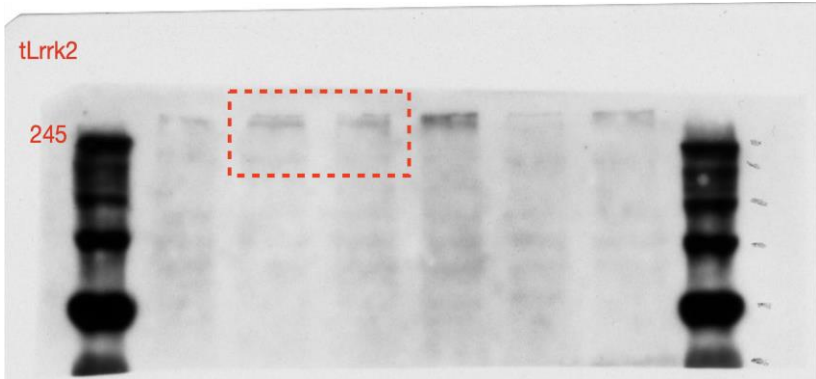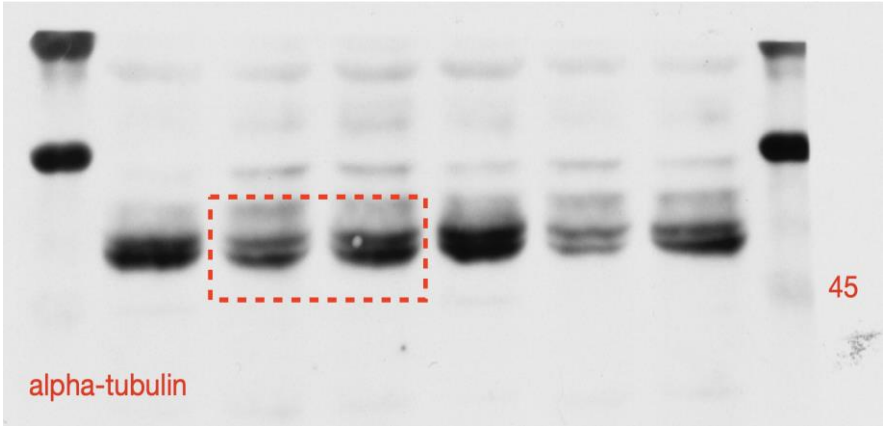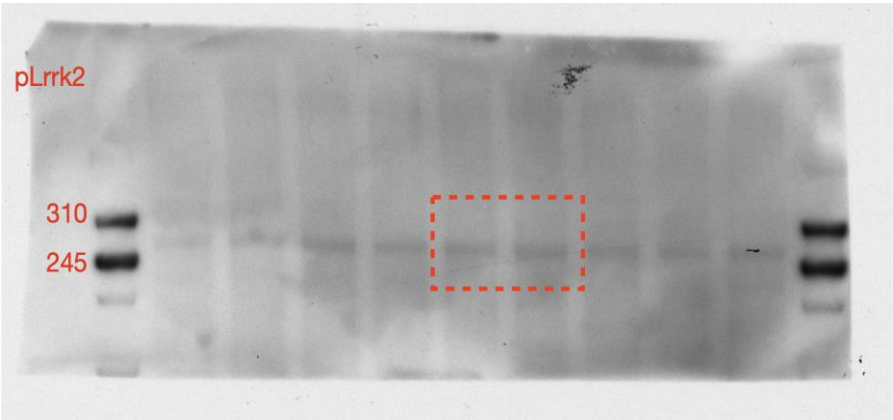

Supplement: supp [file elife-73753-supp-v1.zip]
