# Supplementary material for: Glial Nrf2 signaling mediates the neuroprotection exerted by Gastrodia elata Blume in Lrrk2-G2019S Parkinson’s disease
Source: eLife. 2021 Nov 15;10:e73753. doi: 10.7554/eLife.73753 (PMC8660019; doi:10.7554/eLife.73753)
Supplement: Source data 1. — The file includes all data and the statistical analyses in this article. [file elife-73753-supp1.xlsx]

## Sheet: 1A
	week 1	Lrrk2	G2019S	0.1	0.5	1		one-way anova
	success rate	82.8571	88.2353	85.2941	94.2857	83.3333		ANOVA table	SS	DF	MS	F (DFn, DFd)	P value
		97.1429	88.2353	88.2353	91.4286	91.6667		Treatment (between columns)	203.3	4	50.82	F (4, 25) = 3.484	P=0.0215
		94.2857	88.2353	82.3529	82.8571	91.6667		Residual (within columns)	364.6	25	14.58
		91.4286	85.2941	79.4118	91.4286	88.8889		Total	567.9	29
		88.5714	85.2941	79.4118	82.8571	91.6667
		91.4286	85.2941	85.2941	88.2353	88.8889
								Tukey's multiple comparisons test	Mean Diff.	95.00% CI of diff.	Below threshold?	Summary	Adjusted P Value
								Lrrk2 vs. G2019S	4.188	-2.288 to 10.66	No	ns	0.3436
								Lrrk2 vs. 0.1%	7.619	1.144 to 14.09	Yes	*	0.0154
								Lrrk2 vs. 0.5%	2.437	-4.038 to 8.912	No	ns	0.8022
								Lrrk2 vs. 1.0%	1.601	-4.875 to 8.076	No	ns	0.9484
								G2019S vs. 0.1%	3.431	-3.044 to 9.907	No	ns	0.5375
								G2019S vs. 0.5%	-1.751	-8.226 to 4.725	No	ns	0.9299
								G2019S vs. 1.0%	-2.587	-9.063 to 3.888	No	ns	0.766
								0.1% vs. 0.5%	-5.182	-11.66 to 1.293	No	ns	0.1626
								0.1% vs. 1.0%	-6.019	-12.49 to 0.4569	No	ns	0.0775
								0.5% vs. 1.0%	-0.8365	-7.312 to 5.639	No	ns	0.9953
	week 2	Lrrk2	G2019S	0.1	0.5	1		one-way anova
	success rate	85.7143	82.3529	90.9091	88.5714	85.7143		ANOVA table	SS	DF	MS	F (DFn, DFd)	P value
		88.5714	79.4118	87.8788	88.5714	82.8571		Treatment (between columns)	223.9	4	55.98	F (4, 25) = 11.21	P<0.0001
		85.7143	85.2941	87.8788	88.5714	82.8571		Residual (within columns)	124.8	25	4.993
		88.5714	82.3529	84.8485	85.7143	82.8571		Total	348.7	29
		88.5714	76.4706	84.8485	85.7143	82.8571
		85.7143	76.4706	87.8788	85.7143	85.7143
								Tukey's multiple comparisons test	Mean Diff.	95.00% CI of diff.	Below threshold?	Summary	Adjusted P Value
								Lrrk2 vs. G2019S	6.751	2.962 to 10.54	Yes	***	0.0002
								Lrrk2 vs. 0.1%	-0.2309	-4.020 to 3.558	No	ns	0.9998
								Lrrk2 vs. 0.5%	0	-3.789 to 3.789	No	ns	>0.9999
								Lrrk2 vs. 1.0%	3.333	-0.4556 to 7.122	No	ns	0.1042
								G2019S vs. 0.1%	-6.982	-10.77 to -3.193	Yes	***	0.0001
								G2019S vs. 0.5%	-6.751	-10.54 to -2.962	Yes	***	0.0002
								G2019S vs. 1.0%	-3.417	-7.206 to 0.3715	No	ns	0.0914
								0.1% vs. 0.5%	0.2309	-3.558 to 4.020	No	ns	0.9998
								0.1% vs. 1.0%	3.564	-0.2247 to 7.353	No	ns	0.0724
								0.5% vs. 1.0%	3.333	-0.4556 to 7.122	No	ns	0.1042
	week 3	Lrrk2	G2019S	0.1	0.5	1		one-way anova
	success rate	82.8571	47.0588	61.2903	60	55.8824		ANOVA table	SS	DF	MS	F (DFn, DFd)	P value
		82.8571	47.0588	74.1936	57.1429	58.8235		Treatment (between columns)	5180	4	1295	F (4, 25) = 56.65	P<0.0001
		80	41.1765	74.1936	62.8571	55.8824		Residual (within columns)	571.5	25	22.86
		88.5714	38.2353	74.1936	54.2857	50		Total	5752	29
		82.8571	44.1176	58.0645	54.2857	50
		80	47.0588	61.2903	51.4286	55.8824
								Tukey's multiple comparisons test	Mean Diff.	95.00% CI of diff.	Below threshold?	Summary	Adjusted P Value
								Lrrk2 vs. G2019S	38.74	30.63 to 46.85	Yes	****	<0.0001
								Lrrk2 vs. 0.1%	15.65	7.546 to 23.76	Yes	****	<0.0001
								Lrrk2 vs. 0.5%	26.19	18.08 to 34.30	Yes	****	<0.0001
								Lrrk2 vs. 1.0%	28.45	20.34 to 36.55	Yes	****	<0.0001
								G2019S vs. 0.1%	-23.09	-31.19 to -14.98	Yes	****	<0.0001
								G2019S vs. 0.5%	-12.55	-20.66 to -4.442	Yes	**	0.0011
								G2019S vs. 1.0%	-10.29	-18.40 to -2.187	Yes	**	0.008
								0.1% vs. 0.5%	10.54	2.430 to 18.64	Yes	**	0.0065
								0.1% vs. 1.0%	12.79	4.685 to 20.90	Yes	***	0.0008
								0.5% vs. 1.0%	2.255	-5.852 to 10.36	No	ns	0.923
	week 4	Lrrk2	G2019S	0.1	0.5	1		one-way anova
	success rate	68.5714	17.6471	42.8571	48.5714	47.0588		ANOVA table	SS	DF	MS	F (DFn, DFd)	P value
		62.8571	17.6471	64.2857	45.7143	47.0588		Treatment (between columns)	8305	4	2076	F (4, 25) = 38.55	P<0.0001
		54.2857	20.5882	64.2857	45.7143	38.2353		Residual (within columns)	1346	25	53.86
		51.4286	17.6471	75	48.5714	47.0588		Total	9651	29
		60	20.5882	75	48.5714	50
		51.4286	8.82353	75	40	35.2941
								Tukey's multiple comparisons test	Mean Diff.	95.00% CI of diff.	Below threshold?	Summary	Adjusted P Value
								Lrrk2 vs. G2019S	40.94	28.49 to 53.38	Yes	****	<0.0001
								Lrrk2 vs. 0.1%	-7.976	-20.42 to 4.467	No	ns	0.3521
								Lrrk2 vs. 0.5%	11.9	-0.5387 to 24.35	No	ns	0.0656
								Lrrk2 vs. 1.0%	13.98	1.534 to 26.42	Yes	*	0.0222
								G2019S vs. 0.1%	-48.91	-61.36 to -36.47	Yes	****	<0.0001
								G2019S vs. 0.5%	-29.03	-41.48 to -16.59	Yes	****	<0.0001
								G2019S vs. 1.0%	-26.96	-39.40 to -14.52	Yes	****	<0.0001
								0.1% vs. 0.5%	19.88	7.437 to 32.32	Yes	***	0.0007
								0.1% vs. 1.0%	21.95	9.510 to 34.40	Yes	***	0.0002
								0.5% vs. 1.0%	2.073	-10.37 to 14.52	No	ns	0.9877
	week 5	Lrrk2	G2019S	0.1	0.5	1		one-way anova
	success rate	29.4118	12.5	55.5556	2.85714	3.0303		ANOVA table	SS	DF	MS	F (DFn, DFd)	P value
		32.3529	3.125	25.9259	2.85714	3.0303		Treatment (between columns)	10719	4	2680	F (4, 25) = 57.29	P<0.0001
		38.2353	6.25	44.4444	2.85714	6.06061		Residual (within columns)	1169	25	46.77
		47.0588	3.125	59.2593	2.85714	9.09091		Total	11888	29
		47.0588	0	51.8518	2.85714	3.0303
		29.4118	3.125	44.4444	2.85714	3.0303
								Tukey's multiple comparisons test	Mean Diff.	95.00% CI of diff.	Below threshold?	Summary	Adjusted P Value
								Lrrk2 vs. G2019S	32.57	20.97 to 44.16	Yes	****	<0.0001
								Lrrk2 vs. 0.1%	-9.659	-21.26 to 1.938	No	ns	0.136
								Lrrk2 vs. 0.5%	34.4	22.80 to 45.99	Yes	****	<0.0001
								Lrrk2 vs. 1.0%	32.71	21.11 to 44.31	Yes	****	<0.0001
								G2019S vs. 0.1%	-42.23	-53.82 to -30.63	Yes	****	<0.0001
								G2019S vs. 0.5%	1.83	-9.766 to 13.43	No	ns	0.9899
								G2019S vs. 1.0%	0.142	-11.45 to 11.74	No	ns	>0.9999
								0.1% vs. 0.5%	44.06	32.46 to 55.65	Yes	****	<0.0001
								0.1% vs. 1.0%	42.37	30.77 to 53.96	Yes	****	<0.0001
								0.5% vs. 1.0%	-1.688	-13.28 to 9.908	No	ns	0.9926
	week 6	Lrrk2	G2019S	0.1	0.5	1		one-way anova
	success rate	43.75	3.44828	51.8518	5.88235	3.0303		ANOVA table	SS	DF	MS	F (DFn, DFd)	P value
		43.75	3.44828	55.5556	2.94118	6.06061		Treatment (between columns)	10671	4	2668	F (4, 25) = 140.4	P<0.0001
		34.375	3.44828	48.1482	2.94118	9.09091		Residual (within columns)	475	25	19
		40.625	6.89655	44.4444	2.94118	3.0303		Total	11146	29
		28.125	3.44828	44.4444	2.94118	9.09091
		28.125	0	44.4444	2.94118	12.1212
								Tukey's multiple comparisons test	Mean Diff.	95.00% CI of diff.	Below threshold?	Summary	Adjusted P Value
								Lrrk2 vs. G2019S	33.01	25.62 to 40.40	Yes	****	<0.0001
								Lrrk2 vs. 0.1%	-11.69	-19.08 to -4.299	Yes	***	0.0008
								Lrrk2 vs. 0.5%	33.03	25.64 to 40.42	Yes	****	<0.0001
								Lrrk2 vs. 1.0%	29.39	22.00 to 36.78	Yes	****	<0.0001
								G2019S vs. 0.1%	-44.7	-52.09 to -37.31	Yes	****	<0.0001
								G2019S vs. 0.5%	0.0169	-7.374 to 7.408	No	ns	>0.9999
								G2019S vs. 1.0%	-3.622	-11.01 to 3.769	No	ns	0.6092
								0.1% vs. 0.5%	44.72	37.33 to 52.11	Yes	****	<0.0001
								0.1% vs. 1.0%	41.08	33.69 to 48.47	Yes	****	<0.0001
								0.5% vs. 1.0%	-3.639	-11.03 to 3.752	No	ns	0.605

## Sheet: 1B
week1	Lrrk2	G2019S	0.1GAS	1.0GAS		one-way ANOVA
success rate	85	87.1795	86.8421	81.7949		ANOVA table	SS	DF	MS	F (DFn, DFd)	P value
	75	92.3077	78.9474	74.1026		Treatment (between columns)	578.2	3	192.7	F (3, 20) = 15.26	P<0.0001
	80	87.1795	81.579	74.1026		Residual (within columns)	252.5	20	12.63
	80	87.1795	84.2105	71.7949		Total	830.7	23
	77.5	87.1795	84.2105	81.7949
	77.5	92.3077	86.8421	71.5385
						Tukey's multiple comparisons test	Mean Diff.	95.00% CI of diff.	Below threshold?	Summary	Adjusted P Value
						Lrrk2 vs. G2019S	-9.722	-15.46 to -3.980	Yes	***	0.0007
						Lrrk2 vs. 0.1GAS	-4.605	-10.35 to 1.137	No	ns	0.1454
						Lrrk2 vs. 1.0GAS	3.312	-2.430 to 9.054	No	ns	0.3934
						G2019S vs. 0.1GAS	5.117	-0.6253 to 10.86	No	ns	0.0915
						G2019S vs. 1.0GAS	13.03	7.292 to 18.78	Yes	****	<0.0001
						0.1GAS vs. 1.0GAS	7.917	2.175 to 13.66	Yes	**	0.005
week2	Lrrk2	G2019S	0.1GAS	1.0GAS		one-way ANOVA
success rate	90	52.6316	69.4444	70.2703		ANOVA table	SS	DF	MS	F (DFn, DFd)	P value
	87.5	63.1579	50	72.973		Treatment (between columns)	3181	3	1060	F (3, 20) = 33.07	P<0.0001
	87.5	60.5263	72.2222	64.8649		Residual (within columns)	641.2	20	32.06
	90	52.6316	69.4444	67.5676		Total	3822	23
	87.5	47.3684	69.4444	75.6757
	82.5	57.8947	63.8889	75.6757
						Tukey's multiple comparisons test	Mean Diff.	95.00% CI of diff.	Below threshold?	Summary	Adjusted P Value
						Lrrk2 vs. G2019S	31.8	22.65 to 40.95	Yes	****	<0.0001
						Lrrk2 vs. 0.1GAS	21.76	12.61 to 30.91	Yes	****	<0.0001
						Lrrk2 vs. 1.0GAS	16.33	7.179 to 25.48	Yes	***	0.0004
						G2019S vs. 0.1GAS	-10.04	-19.19 to -0.8889	Yes	*	0.0283
						G2019S vs. 1.0GAS	-15.47	-24.62 to -6.319	Yes	***	0.0007
						0.1GAS vs. 1.0GAS	-5.43	-14.58 to 3.720	No	ns	0.3692
week3	Lrrk2	G2019S	0.1GAS	1.0GAS		one-way ANOVA
success rate	90	57.8947	86.1111	94.5946		ANOVA table	SS	DF	MS	F (DFn, DFd)	P value
	90	60.5263	83.3333	89.1892		Treatment (between columns)	2863	3	954.2	F (3, 20) = 55.81	P<0.0001
	87.5	71.0526	86.1111	86.4865		Residual (within columns)	341.9	20	17.1
	90	65.7895	83.3333	89.1892		Total	3205	23
	87.5	55.2632	83.3333	86.4865
	77.5	60.5263	86.1111	86.4865
						Tukey's multiple comparisons test	Mean Diff.	95.00% CI of diff.	Below threshold?	Summary	Adjusted P Value
						Lrrk2 vs. G2019S	25.24	18.56 to 31.92	Yes	****	<0.0001
						Lrrk2 vs. 0.1GAS	2.361	-4.321 to 9.043	No	ns	0.7572
						Lrrk2 vs. 1.0GAS	-1.655	-8.337 to 5.026	No	ns	0.8984
						G2019S vs. 0.1GAS	-22.88	-29.56 to -16.20	Yes	****	<0.0001
						G2019S vs. 1.0GAS	-26.9	-33.58 to -20.21	Yes	****	<0.0001
						0.1GAS vs. 1.0GAS	-4.017	-10.70 to 2.665	No	ns	0.3584
week4	Lrrk2	G2019S	0.1GAS	1.0GAS		one-way ANOVA
success rate	82.5	18.4211	44.4444	40.5405		ANOVA table	SS	DF	MS	F (DFn, DFd)	P value
	87.5	31.5789	33.3333	48.6487		Treatment (between columns)	9744	3	3248	F (3, 20) = 104.0	P<0.0001
	85	31.5789	33.3333	37.8378		Residual (within columns)	624.4	20	31.22
	77.5	31.5789	41.6667	54.054		Total	10369	23
	72.5	26.3158	44.4444	40.5405
	82.5	23.6842	41.6667	40.5405
						Tukey's multiple comparisons test	Mean Diff.	95.00% CI of diff.	Below threshold?	Summary	Adjusted P Value
						Lrrk2 vs. G2019S	54.06	45.03 to 63.09	Yes	****	<0.0001
						Lrrk2 vs. 0.1GAS	41.44	32.41 to 50.46	Yes	****	<0.0001
						Lrrk2 vs. 1.0GAS	37.56	28.53 to 46.59	Yes	****	<0.0001
						G2019S vs. 0.1GAS	-12.62	-21.65 to -3.593	Yes	**	0.0044
						G2019S vs. 1.0GAS	-16.5	-25.53 to -7.472	Yes	***	0.0003
						0.1GAS vs. 1.0GAS	-3.879	-12.91 to 5.150	No	ns	0.6324
week5	Lrrk2	G2019S	0.1GAS	1.0GAS		one-way ANOVA
success rate	51.282	2.85714	5.71429	45.946		ANOVA table	SS	DF	MS	F (DFn, DFd)	P value
	66.6667	0	2.85714	45.946		Treatment (between columns)	18551	3	6184	F (3, 20) = 259.3	P<0.0001
	69.2308	5.71429	2.85714	54.054		Residual (within columns)	476.9	20	23.85
	71.7949	0	2.85714	45.946		Total	19028	23
	69.2308	5.71429	2.85714	51.3513
	58.9744	0	0	56.7568
						Tukey's multiple comparisons test	Mean Diff.	95.00% CI of diff.	Below threshold?	Summary	Adjusted P Value
						Lrrk2 vs. G2019S	62.15	54.26 to 70.04	Yes	****	<0.0001
						Lrrk2 vs. 0.1GAS	61.67	53.78 to 69.56	Yes	****	<0.0001
						Lrrk2 vs. 1.0GAS	14.53	6.639 to 22.42	Yes	***	0.0003
						G2019S vs. 0.1GAS	-0.4762	-8.367 to 7.415	No	ns	0.9982
						G2019S vs. 1.0GAS	-47.62	-55.51 to -39.73	Yes	****	<0.0001
						0.1GAS vs. 1.0GAS	-47.14	-55.03 to -39.25	Yes	****	<0.0001
week6	Lrrk2	G2019S	0.1GAS	1.0GAS		one-way ANOVA
success rate	55.2632	0	12.5	19.4444		ANOVA table	SS	DF	MS	F (DFn, DFd)	P value
	60.5263	0	12.5	25		Treatment (between columns)	11560	3	3853	F (3, 20) = 113.6	P<0.0001
	63.1579	2.94118	9.375	33.3333		Residual (within columns)	678.6	20	33.93
	60.5263	0	9.375	19.4444		Total	12239	23
	52.6316	2.94118	9.375	22.2222
	57.8947	2.94118	0	44.4444
						Tukey's multiple comparisons test	Mean Diff.	95.00% CI of diff.	Below threshold?	Summary	Adjusted P Value
						Lrrk2 vs. G2019S	56.86	47.45 to 66.28	Yes	****	<0.0001
						Lrrk2 vs. 0.1GAS	49.48	40.07 to 58.89	Yes	****	<0.0001
						Lrrk2 vs. 1.0GAS	31.02	21.61 to 40.43	Yes	****	<0.0001
						G2019S vs. 0.1GAS	-7.384	-16.80 to 2.029	No	ns	0.1587
						G2019S vs. 1.0GAS	-25.84	-35.26 to -16.43	Yes	****	<0.0001
						0.1GAS vs. 1.0GAS	-18.46	-27.87 to -9.048	Yes	***	0.0001

## Sheet: 1C
week1	Lrrk2	G2019S	0.1HBA	1.0HBA		one-way ANOVA
success rate	96.6667	93.3333	93.3333	93.3333		ANOVA table	SS	DF	MS	F (DFn, DFd)	P value
	96.6667	93.3333	90	96.6667		Treatment (between columns)	25.93	3	8.642	F (3, 20) = 3.111	P=0.0494
	96.6667	96.6667	96.6667	93.3333		Residual (within columns)	55.56	20	2.778
	96.6667	93.3333	93.3333	93.3333		Total	81.48	23
	96.6667	96.6667	93.3333	93.3333
	93.3333	93.3333	93.3333	93.3333
						Tukey's multiple comparisons test	Mean Diff.	95.00% CI of diff.	Below threshold?	Summary	Adjusted P Value
						Lrrk2 vs. G2019S	1.667	-1.027 to 4.360	No	ns	0.3341
						Lrrk2 vs. 0.1HBA	2.778	0.08451 to 5.471	Yes	*	0.0417
						Lrrk2 vs. 1.0HBA	2.222	-0.4711 to 4.915	No	ns	0.1293
						G2019S vs. 0.1HBA	1.111	-1.582 to 3.804	No	ns	0.6611
						G2019S vs. 1.0HBA	0.5556	-2.138 to 3.249	No	ns	0.9377
						0.1HBA vs. 1.0HBA	-0.5556	-3.249 to 2.138	No	ns	0.9377
week2	Lrrk2	G2019S	0.1HBA	1.0HBA		one-way ANOVA
success rate	96.6667	86.6667	83.3333	86.6667		ANOVA table	SS	DF	MS	F (DFn, DFd)	P value
	100	93.3333	90	96.6667		Treatment (between columns)	600	3	200	F (3, 20) = 13.17	P<0.0001
	100	86.6667	86.6667	93.3333		Residual (within columns)	303.7	20	15.19
	96.6667	86.6667	80	93.3333		Total	903.7	23
	100	93.3333	86.6667	93.3333
	93.3333	80	80	90
						Tukey's multiple comparisons test	Mean Diff.	95.00% CI of diff.	Below threshold?	Summary	Adjusted P Value
						Lrrk2 vs. G2019S	10	3.703 to 16.30	Yes	**	0.0013
						Lrrk2 vs. 0.1HBA	13.33	7.036 to 19.63	Yes	****	<0.0001
						Lrrk2 vs. 1.0HBA	5.556	-0.7416 to 11.85	No	ns	0.096
						G2019S vs. 0.1HBA	3.333	-2.964 to 9.630	No	ns	0.4664
						G2019S vs. 1.0HBA	-4.444	-10.74 to 1.853	No	ns	0.2302
						0.1HBA vs. 1.0HBA	-7.778	-14.07 to -1.481	Yes	*	0.0122
week3	Lrrk2	G2019S	0.1HBA	1.0HBA		one-way ANOVA
success rate	85.7143	68.9655	83.3333	93.3333		ANOVA table	SS	DF	MS	F (DFn, DFd)	P value
	92.8571	75.8621	80	90		Treatment (between columns)	1241	3	413.7	F (3, 20) = 27.92	P<0.0001
	82.1429	72.4138	80	90		Residual (within columns)	296.3	20	14.82
	96.4286	75.8621	73.3333	93.3333		Total	1537	23
	85.7143	75.8621	86.6667	93.3333
	89.2857	72.4138	83.3333	93.3333
						Tukey's multiple comparisons test	Mean Diff.	95.00% CI of diff.	Below threshold?	Summary	Adjusted P Value
						Lrrk2 vs. G2019S	15.13	8.907 to 21.35	Yes	****	<0.0001
						Lrrk2 vs. 0.1HBA	7.579	1.359 to 13.80	Yes	*	0.0136
						Lrrk2 vs. 1.0HBA	-3.532	-9.752 to 2.689	No	ns	0.4068
						G2019S vs. 0.1HBA	-7.548	-13.77 to -1.328	Yes	*	0.014
						G2019S vs. 1.0HBA	-18.66	-24.88 to -12.44	Yes	****	<0.0001
						0.1HBA vs. 1.0HBA	-11.11	-17.33 to -4.891	Yes	***	0.0004
week4	Lrrk2	G2019S	0.1HBA	1.0HBA		one-way ANOVA
success rate	82.1429	20.6897	66.6667	80		ANOVA table	SS	DF	MS	F (DFn, DFd)	P value
	71.4286	62.069	70	83.3333		Treatment (between columns)	3850	3	1283	F (3, 20) = 10.24	P=0.0003
	64.2857	55.1724	73.3333	83.3333		Residual (within columns)	2506	20	125.3
	64.2857	58.6207	56.6667	76.6667		Total	6357	23
	82.1429	20.6897	70	76.6667
	71.4286	55.1724	76.6667	73.3333
						Tukey's multiple comparisons test	Mean Diff.	95.00% CI of diff.	Below threshold?	Summary	Adjusted P Value
						Lrrk2 vs. G2019S	27.22	9.126 to 45.31	Yes	**	0.0022
						Lrrk2 vs. 0.1HBA	3.73	-14.36 to 21.82	No	ns	0.9378
						Lrrk2 vs. 1.0HBA	-6.27	-24.36 to 11.82	No	ns	0.7677
						G2019S vs. 0.1HBA	-23.49	-41.58 to -5.396	Yes	**	0.0083
						G2019S vs. 1.0HBA	-33.49	-51.58 to -15.40	Yes	***	0.0002
						0.1HBA vs. 1.0HBA	-10	-28.09 to 8.090	No	ns	0.4297
week5	Lrrk2	G2019S	0.1HBA	1.0HBA		one-way ANOVA
success rate	62.5	24.1379	51.7241	76.6667		ANOVA table	SS	DF	MS	F (DFn, DFd)	P value
	62.5	55.1724	55.1724	83.3333		Treatment (between columns)	6659	3	2220	F (3, 20) = 27.07	P<0.0001
	75	55.1724	58.6207	86.6667		Residual (within columns)	1640	20	81.99
	62.5	34.4828	37.931	76.6667		Total	8299	23
	75	31.0345	58.6207	83.3333
	62.5	24.1379	51.7241	86.6667
						Tukey's multiple comparisons test	Mean Diff.	95.00% CI of diff.	Below threshold?	Summary	Adjusted P Value
						Lrrk2 vs. G2019S	29.31	14.68 to 43.94	Yes	****	<0.0001
						Lrrk2 vs. 0.1HBA	14.37	-0.2646 to 29.00	No	ns	0.0554
						Lrrk2 vs. 1.0HBA	-15.56	-30.19 to -0.9232	Yes	*	0.0347
						G2019S vs. 0.1HBA	-14.94	-29.57 to -0.3101	Yes	*	0.0443
						G2019S vs. 1.0HBA	-44.87	-59.50 to -30.23	Yes	****	<0.0001
						0.1HBA vs. 1.0HBA	-29.92	-44.56 to -15.29	Yes	****	<0.0001
week6	Lrrk2	G2019S	0.1HBA	1.0HBA		one-way ANOVA
success rate	54.1667	17.5862	10.3448	76.6667		ANOVA table	SS	DF	MS	F (DFn, DFd)	P value
	50	7.24138	34.4828	70		Treatment (between columns)	11951	3	3984	F (3, 20) = 48.74	P<0.0001
	83.3333	10.6897	37.931	66.6667		Residual (within columns)	1635	20	81.74
	50	14.1379	34.4828	70		Total	13586	23
	50	11.0345	34.4828	66.6667
	50	10.3448	41.3793	70
						Tukey's multiple comparisons test	Mean Diff.	95.00% CI of diff.	Below threshold?	Summary	Adjusted P Value
						Lrrk2 vs. G2019S	44.41	29.80 to 59.02	Yes	****	<0.0001
						Lrrk2 vs. 0.1HBA	24.07	9.456 to 38.68	Yes	***	0.0009
						Lrrk2 vs. 1.0HBA	-13.75	-28.36 to 0.8600	No	ns	0.0697
						G2019S vs. 0.1HBA	-20.34	-34.95 to -5.735	Yes	**	0.0046
						G2019S vs. 1.0HBA	-58.16	-72.77 to -43.55	Yes	****	<0.0001
						0.1HBA vs. 1.0HBA	-37.82	-52.43 to -23.21	Yes	****	<0.0001

## Sheet: 1D
		Ddc>Lrrk2	Ddc>G2019S	0.1% WGE
	total traveled distance	139.779	28.8009	111.081		ANOVA table	SS	DF	MS	F (DFn, DFd)	P value
		200.378	10.1434	112.904		Treatment (between columns)	78835	2	39418	F (2, 21) = 28.80	P<0.0001
		183.833	53.9801	123.396		Residual (within columns)	28742	21	1369
		58.1925	48.0811	129.298		Total	107577	23
		224.528	4.40974	119.841
		148.59	33.9079	181.112
		214.032	28.2374	89.0555
		170.011	43.9918	170.751
						Tukey's multiple comparisons test	Mean Diff.	95.00% CI of diff.	Below threshold?	Summary	Adjusted P Value
						Lrrk2 vs. G2019S	136	89.35 to 182.6	Yes	****	<0.0001
						Lrrk2 vs. 0.1W	37.74	-8.887 to 84.36	No	ns	0.1273
						G2019S vs. 0.1W	-98.24	-144.9 to -51.61	Yes	****	<0.0001

## Sheet: 2B
	PPL1-week2
		Lrrk2	G2019S	0.1W
	# of dopaminergic neurons	13	9	13	ANOVA table	SS	DF	MS	F (DFn, DFd)	P value		Tukey's multiple comparisons test	Mean Diff.	95.00% CI of diff.	Below threshold?	Summary	Adjusted P Value
		13	10.5	11	Treatment (between columns)	22.9	2	11.45	F (2, 12) = 8.228	P=0.0056		Lrrk2 vs. G2019S	2.9	0.9095 to 4.890	Yes	**	0.0057
		14.5	10	12.5	Residual (within columns)	16.7	12	1.392				Lrrk2 vs. 0.1W	0.7	-1.290 to 2.690	No	ns	0.6276
		14.5	12.5	13.5	Total	39.6	14					G2019S vs. 0.1W	-2.2	-4.190 to -0.2095	Yes	*	0.0304
		13	11.5	14.5
	PPL1-week4
		Lrrk2	G2019S	0.1W
	# of dopaminergic neurons	14	10	15	ANOVA table	SS	DF	MS	F (DFn, DFd)	P value		Tukey's multiple comparisons test	Mean Diff.	95.00% CI of diff.	Below threshold?	Summary	Adjusted P Value
		14	10.5	14	Treatment (between columns)	46.9	2	23.45	F (2, 12) = 87.94	P<0.0001		Lrrk2 vs. G2019S	3.8	2.929 to 4.671	Yes	****	<0.0001
		14	10.5	13.5	Residual (within columns)	3.2	12	0.2667				Lrrk2 vs. 0.1W	0.1	-0.7713 to 0.9713	No	ns	0.9498
		14	10	13.5	Total	50.1	14					G2019S vs. 0.1W	-3.7	-4.571 to -2.829	Yes	****	<0.0001
		15	11	14.5
	PPL1-week6
		Lrrk2	G2019S	0.1W
	# of dopaminergic neurons	13.5	9	15	ANOVA table	SS	DF	MS	F (DFn, DFd)	P value		Tukey's multiple comparisons test	Mean Diff.	95.00% CI of diff.	Below threshold?	Summary	Adjusted P Value
		11.5	9.5	13	Treatment (between columns)	51.1	2	25.55	F (2, 12) = 25.55	P<0.0001		Lrrk2 vs. G2019S	3.7	2.013 to 5.387	Yes	***	0.0002
		14	11.5	14	Residual (within columns)	12	12	1				Lrrk2 vs. 0.1W	-0.4	-2.087 to 1.287	No	ns	0.8054
		14.5	10	14	Total	63.1	14					G2019S vs. 0.1W	-4.1	-5.787 to -2.413	Yes	****	<0.0001
		14	9	13.5
	ppm1/2-week 2	Lrrk2	G2019S	0.1W
	# of dopaminergic neurons	8	6	7	ANOVA table	SS	DF	MS	F (DFn, DFd)	P value		Tukey's multiple comparisons test	Mean Diff.	95.00% CI of diff.	Below threshold?	Summary	Adjusted P Value
		7.5	6.5	7	Treatment (between columns)	2.1	2	1.05	F (2, 12) = 2.520	P=0.1220		Lrrk2 vs. G2019S	0.9	-0.1892 to 1.989	No	ns	0.1107
		7.5	6.5	7.5	Residual (within columns)	5	12	0.4167				Lrrk2 vs. 0.1W	0.6	-0.4892 to 1.689	No	ns	0.3389
		8	8	7	Total	7.1	14					G2019S vs. 0.1W	-0.3	-1.389 to 0.7892	No	ns	0.7481
		8.5	8	8
	ppm1/2-week 4	Lrrk2	G2019S	0.1W
	# of dopaminergic neurons	9	5	9.5	ANOVA table	SS	DF	MS	F (DFn, DFd)	P value		Tukey's multiple comparisons test	Mean Diff.	95.00% CI of diff.	Below threshold?	Summary	Adjusted P Value
		8.5	6	8	Treatment (between columns)	29.63	2	14.82	F (2, 12) = 41.35	P<0.0001		Lrrk2 vs. G2019S	2.7	1.690 to 3.710	Yes	****	<0.0001
		8.5	6.5	8.5	Residual (within columns)	4.3	12	0.3583				Lrrk2 vs. 0.1W	-0.5	-1.510 to 0.5100	No	ns	0.4111
		8	5.5	9	Total	33.93	14					G2019S vs. 0.1W	-3.2	-4.210 to -2.190	Yes	****	<0.0001
		7.5	5	9
	ppm1/2-week 6	Lrrk2	G2019S	0.1W
	# of dopaminergic neurons	9.5	4.5	9	ANOVA table	SS	DF	MS	F (DFn, DFd)	P value		Tukey's multiple comparisons test	Mean Diff.	95.00% CI of diff.	Below threshold?	Summary	Adjusted P Value
		8.5	5.5	9	Treatment (between columns)	43.23	2	21.62	F (2, 12) = 30.16	P<0.0001		Lrrk2 vs. G2019S	3.2	1.772 to 4.628	Yes	***	0.0002
		7.5	5	7.5	Residual (within columns)	8.6	12	0.7167				Lrrk2 vs. 0.1W	-0.7	-2.128 to 0.7284	No	ns	0.4179
		7.5	5.5	9	Total	51.83	14					G2019S vs. 0.1W	-3.9	-5.328 to -2.472	Yes	****	<0.0001
		7	3.5	9
	ppl2-week 2	Lrrk2	G2019S	0.1W
	# of dopaminergic neurons	6.5	4	5.5	ANOVA table	SS	DF	MS	F (DFn, DFd)	P value		Tukey's multiple comparisons test	Mean Diff.	95.00% CI of diff.	Below threshold?	Summary	Adjusted P Value
		6.5	6	6.5	Treatment (between columns)	10.23	2	5.117	F (2, 12) = 10.77	P=0.0021		Lrrk2 vs. G2019S	1.7	0.5371 to 2.863	Yes	**	0.0055
		6	5	7	Residual (within columns)	5.7	12	0.475				Lrrk2 vs. 0.1W	-0.1	-1.263 to 1.063	No	ns	0.9715
		6.5	4.5	7	Total	15.93	14					G2019S vs. 0.1W	-1.8	-2.963 to -0.6371	Yes	**	0.0037
		7.5	5	7.5
	ppl2-week 4	Lrrk2	G2019S	0.1W
	# of dopaminergic neurons	6	4	6	ANOVA table	SS	DF	MS	F (DFn, DFd)	P value		Tukey's multiple comparisons test	Mean Diff.	95.00% CI of diff.	Below threshold?	Summary	Adjusted P Value
		6.5	4.5	6.5	Treatment (between columns)	23.43	2	11.72	F (2, 12) = 29.29	P<0.0001		Lrrk2 vs. G2019S	2.6	1.533 to 3.667	Yes	****	<0.0001
		6	4.5	7	Residual (within columns)	4.8	12	0.4				Lrrk2 vs. 0.1W	-0.1	-1.167 to 0.9671	No	ns	0.9662
		7	3	6.5	Total	28.23	14					G2019S vs. 0.1W	-2.7	-3.767 to -1.633	Yes	****	<0.0001
		6	2.5	6
	ppl2-week 6	Lrrk2	G2019S	0.1W
	# of dopaminergic neurons	6	3	7.5	ANOVA table	SS	DF	MS	F (DFn, DFd)	P value		Tukey's multiple comparisons test	Mean Diff.	95.00% CI of diff.	Below threshold?	Summary	Adjusted P Value
		5.5	2.5	6	Treatment (between columns)	23.33	2	11.67	F (2, 12) = 17.72	P=0.0003		Lrrk2 vs. G2019S	2	0.6310 to 3.369	Yes	**	0.0056
		6.5	4	6	Residual (within columns)	7.9	12	0.6583				Lrrk2 vs. 0.1W	-1	-2.369 to 0.3690	No	ns	0.1677
		6	5	7	Total	31.23	14					G2019S vs. 0.1W	-3	-4.369 to -1.631	Yes	***	0.0002
		4.5	4	7
	PPM3-week2	Lrrk2	G2019S	0.1W
	# of dopaminergic neurons	4	3.5	5.5	ANOVA table	SS	DF	MS	F (DFn, DFd)	P value		Tukey's multiple comparisons test	Mean Diff.	95.00% CI of diff.	Below threshold?	Summary	Adjusted P Value
		5	3.5	4	Treatment (between columns)	10.43	2	5.217	F (2, 12) = 7.825	P=0.0067		Lrrk2 vs. G2019S	1.9	0.5223 to 3.278	Yes	**	0.0082
		5.5	4	4.5	Residual (within columns)	8	12	0.6667				Lrrk2 vs. 0.1W	0.3	-1.078 to 1.678	No	ns	0.8327
		5	3.5	5.5	Total	18.43	14					G2019S vs. 0.1W	-1.6	-2.978 to -0.2223	Yes	*	0.0232
		7	2.5	5.5
	PPM3-week4	Lrrk2	G2019S	0.1W
	# of dopaminergic neurons	4.5	2.5	5	ANOVA table	SS	DF	MS	F (DFn, DFd)	P value		Tukey's multiple comparisons test	Mean Diff.	95.00% CI of diff.	Below threshold?	Summary	Adjusted P Value
		6	3	5	Treatment (between columns)	19.2	2	9.6	F (2, 12) = 14.77	P=0.0006		Lrrk2 vs. G2019S	2.4	1.040 to 3.760	Yes	**	0.0014
		5.5	4	6	Residual (within columns)	7.8	12	0.65				Lrrk2 vs. 0.1W	0	-1.360 to 1.360	No	ns	>0.9999
		6.5	3	6.5	Total	27	14					G2019S vs. 0.1W	-2.4	-3.760 to -1.040	Yes	**	0.0014
		6.5	4.5	6.5
	PPM3-week6	Lrrk2	G2019S	0.1W
	# of dopaminergic neurons	6	4	7	ANOVA table	SS	DF	MS	F (DFn, DFd)	P value		Tukey's multiple comparisons test	Mean Diff.	95.00% CI of diff.	Below threshold?	Summary	Adjusted P Value
		7	4	7	Treatment (between columns)	25.2	2	12.6	F (2, 12) = 63.00	P<0.0001		Lrrk2 vs. G2019S	2.4	1.645 to 3.155	Yes	****	<0.0001
		7	4	6.5	Residual (within columns)	2.4	12	0.2				Lrrk2 vs. 0.1W	-0.6	-1.355 to 0.1546	No	ns	0.127
		6.5	4.5	8	Total	27.6	14					G2019S vs. 0.1W	-3	-3.755 to -2.245	Yes	****	<0.0001
		6	4	7

## Sheet: 3B
	Fig3B
	tLrrk2		elav>Lrrk2	elav>G2019S		Unpaired t test			F test to compare variances
		relative expression (% of Lrrk2)	108.544	104.446		P value	0.2722		F, DFn, Dfd	5.508, 2, 2
			97.9721	109.972		P value summary	ns		P value	0.3073
			93.4843	104.101		Significantly different (P < 0.05)?	No		P value summary	ns
						One- or two-tailed P value?	Two-tailed		Significantly different (P < 0.05)?	No
						t, df	t=1.272, df=4
	Fig3B		elav>Lrrk2	elav>G2019S		Unpaired t test			F test to compare variances
	pLrrk2-Ser1292 expression	relative expression (% of Lrrk2)	101.284	295.975		P value	0.0078		F, DFn, Dfd	6.480, 2, 2
			74.8229	227.37		P value summary	**		P value	0.2674
			123.893	352.201		Significantly different (P < 0.05)?	Yes		P value summary	ns
						One- or two-tailed P value?	Two-tailed		Significantly different (P < 0.05)?	No
						t, df	t=4.947, df=4

## Sheet: 3C
			Fig3C	3day-tAkt	elav>Lrrk2	elav>G2019S		Unpaired t test			F test to compare variances
			tAkt	relative expression (% of Lrrk2)	98.7079	125.335		P value	0.8346		F, DFn, Dfd	2.212, 2, 2
					114.047	97.3903		P value summary	ns		P value	0.6226
					87.2452	86.5752		Significantly different (P < 0.05)?	No		P value summary	ns
								One- or two-tailed P value?	Two-tailed		Significantly different (P < 0.05)?	No
								t, df	t=0.2228, df=4
			Fig3C	3day-pAkt	elav>Lrrk2	elav>G2019S		Unpaired t test			F test to compare variances
			pAkt/Akt	relative expression (% of Lrrk2)	97.3093	55.0235		P value	0.0023		F, DFn, Dfd	2.874, 2, 2
					96.8013	70.0373		P value summary	**		P value	0.5162
					105.889	55.0604		Significantly different (P < 0.05)?	Yes		P value summary	ns
								One- or two-tailed P value?	Two-tailed		Significantly different (P < 0.05)?	No
								t, df	t=6.886, df=4

## Sheet: 3E
		Fig3E	week 2	elav>Lrrk2	elav>G2019S	0.1% WGE	ANOVA table	SS	DF	MS	F (DFn, DFd)	P value		Tukey's multiple comparisons test	Mean Diff.	95.00% CI of diff.	Below threshold?	Summary	Adjusted P Value
		tLrrk2 expression	relative expression (% of Lrrk2)	77.7094	232.048	134.938	Treatment (between columns)	24366	2	12183	F (2, 6) = 11.63	P=0.0086		Lrrk2 vs. G2019S	-125.3	-206.4 to -44.16	Yes	**	0.0076
				74.8383	193.237	169.546	Residual (within columns)	6288	6	1048				Lrrk2 vs. 0.1W	-42.25	-123.4 to 38.84	No	ns	0.3165
				147.452	250.497	122.278	Total	30653	8					G2019S vs. 0.1W	83.01	1.908 to 164.1	Yes	*	0.0458
		Fig3E	week 4	elav>Lrrk2	elav>G2019S	0.1% WGE	ANOVA table	SS	DF	MS	F (DFn, DFd)	P value		Tukey's multiple comparisons test	Mean Diff.	95.00% CI of diff.	Below threshold?	Summary	Adjusted P Value
		tLrrk2 expression	relative expression (% of Lrrk2)	115.459	176.721	76.1712	Treatment (between columns)	23098	2	11549	F (2, 6) = 15.72	P=0.0041		Lrrk2 vs. G2019S	-105.4	-173.4 to -37.54	Yes	**	0.0074
				105.96	233.511	78.915	Residual (within columns)	4408	6	734.7				Lrrk2 vs. 0.1W	3.935	-63.97 to 71.84	No	ns	0.9828
				78.5803	206.099	133.107	Total	27506	8					G2019S vs. 0.1W	109.4	41.47 to 177.3	Yes	**	0.0062

## Sheet: 3G
		Fig3G	week 4-tlrrk2	elav>Lrrk2	elav>G2019S	0.1% WGE	ANOVA table	SS	DF	MS	F (DFn, DFd)	P value		Tukey's multiple comparisons test	Mean Diff.	95.00% CI of diff.	Below threshold?	Summary	Adjusted P Value
		tLrrk2 expression	relative expression (% of Lrrk2)	113.429	150.373	97.8442	Treatment (between columns)	3197	2	1599	F (2, 6) = 12.45	P=0.0073		Lrrk2 vs. G2019S	-44.79	-73.18 to -16.41	Yes	**	0.0069
				88.2848	142.62	114.198	Residual (within columns)	770.3	6	128.4				Lrrk2 vs. 0.1W	-12.71	-41.10 to 15.67	No	ns	0.4104
				98.2862	141.391	126.094	Total	3968	8					G2019S vs. 0.1W	32.08	3.697 to 60.47	Yes	*	0.0309
		Fig3G	week 4-plrrk2	elav>Lrrk2	elav>G2019S	0.1% WGE	ANOVA table	SS	DF	MS	F (DFn, DFd)	P value		Tukey's multiple comparisons test	Mean Diff.	95.00% CI of diff.	Below threshold?	Summary	Adjusted P Value
		pLrrk2/tLrrk2 expression	relative expression (% of Lrrk2)	63.8273	206.11	30.3744	Treatment (between columns)	34979	2	17489	F (2, 6) = 19.27	P=0.0024		Lrrk2 vs. G2019S	-110.2	-185.7 to -34.75	Yes	**	0.0099
				129.354	184.49	78.8716	Residual (within columns)	5445	6	907.6				Lrrk2 vs. 0.1W	36.41	-39.06 to 111.9	No	ns	0.3636
				106.819	240.08	81.517	Total	40424	8					G2019S vs. 0.1W	146.6	71.17 to 222.1	Yes	**	0.0024

## Sheet: 3H
		Fig3H	week 4-tRab10	elav>Lrrk2	elav>G2019S	0.1% WGE	ANOVA table	SS	DF	MS	F (DFn, DFd)	P value		Tukey's multiple comparisons test	Mean Diff.	95.00% CI of diff.	Below threshold?	Summary	Adjusted P Value
		tRab10 expression	relative expression (% of Lrrk2)	88.2305	102.92	104.808	Treatment (between columns)	411.8	2	205.9	F (2, 6) = 0.7586	P=0.5085		Lrrk2 vs. G2019S	5.234	-36.04 to 46.51	No	ns	0.921
				91.6672	91.2928	84.4736	Residual (within columns)	1629	6	271.4				Lrrk2 vs. 0.1W	16.23	-25.04 to 57.51	No	ns	0.492
				120.102	90.086	62.0214	Total	2040	8					G2019S vs. 0.1W	11	-30.28 to 52.27	No	ns	0.7068
		Fig3H	week 4-pRab10	elav>Lrrk2	elav>G2019S	0.1% WGE	ANOVA table	SS	DF	MS	F (DFn, DFd)	P value		Tukey's multiple comparisons test	Mean Diff.	95.00% CI of diff.	Below threshold?	Summary	Adjusted P Value
		p-Rab10/t-Rab10 expression	relative expression (% of Lrrk2)	109.104	157.324	104.317	Treatment (between columns)	5959	2	2979	F (2, 6) = 13.32	P=0.0062		Lrrk2 vs. G2019S	-46.47	-83.94 to -9.013	Yes	*	0.0208
				108.724	131.932	72.9949	Residual (within columns)	1342	6	223.6				Lrrk2 vs. 0.1W	13.63	-23.83 to 51.10	No	ns	0.5393
				82.1726	150.169	81.7856	Total	7301	8					G2019S vs. 0.1W	60.11	22.65 to 97.57	Yes	**	0.0063

[truncated: 37 more sheets: 4B, 4D, 5A, 5B, 5D, 6A, 6B, 6D, 6F, 7B, 7C, 7D, 7F, 7H, 8A, 8C, 8E, 9B-distance, 9B-velocity, 9B-movement …]
