# Supplementary material for: Glial Nrf2 signaling mediates the neuroprotection exerted by Gastrodia elata Blume in Lrrk2-G2019S Parkinson’s disease
Source: eLife journal article supplement (doi:10.7554/elife.73753), 2021-11-15
Supplement: supp [file elife-73753-supp-v1.zip]

Figure 1-figure supplement 2

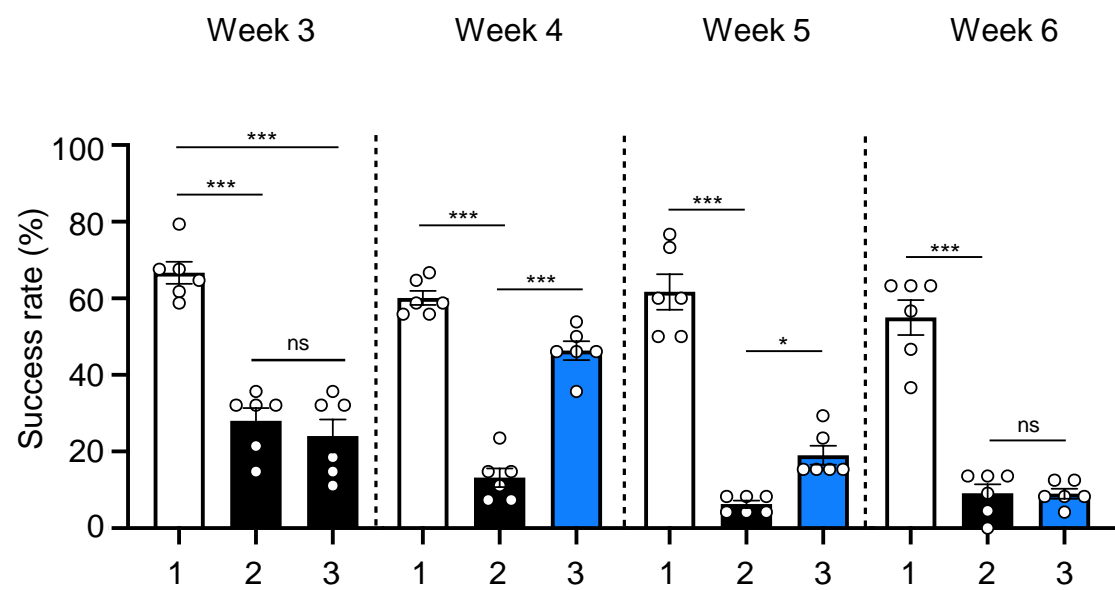

- 1. *Ddc>Lrrk2* at week 3, 4, 5 and 6
- 2. *Ddc>G2019S* at week 3, 4, 5 and 6
- 3. *Ddc>G2019S* at week 3 and starting 0.1% WGE feeding at week 4
