# Supplementary figures and images for: Glial Nrf2 signaling mediates the neuroprotection exerted by Gastrodia elata Blume in Lrrk2-G2019S Parkinson’s disease
Source: eLife journal article supplement (doi:10.7554/elife.73753), 2021-11-15

Figure 1-figure supplement 1

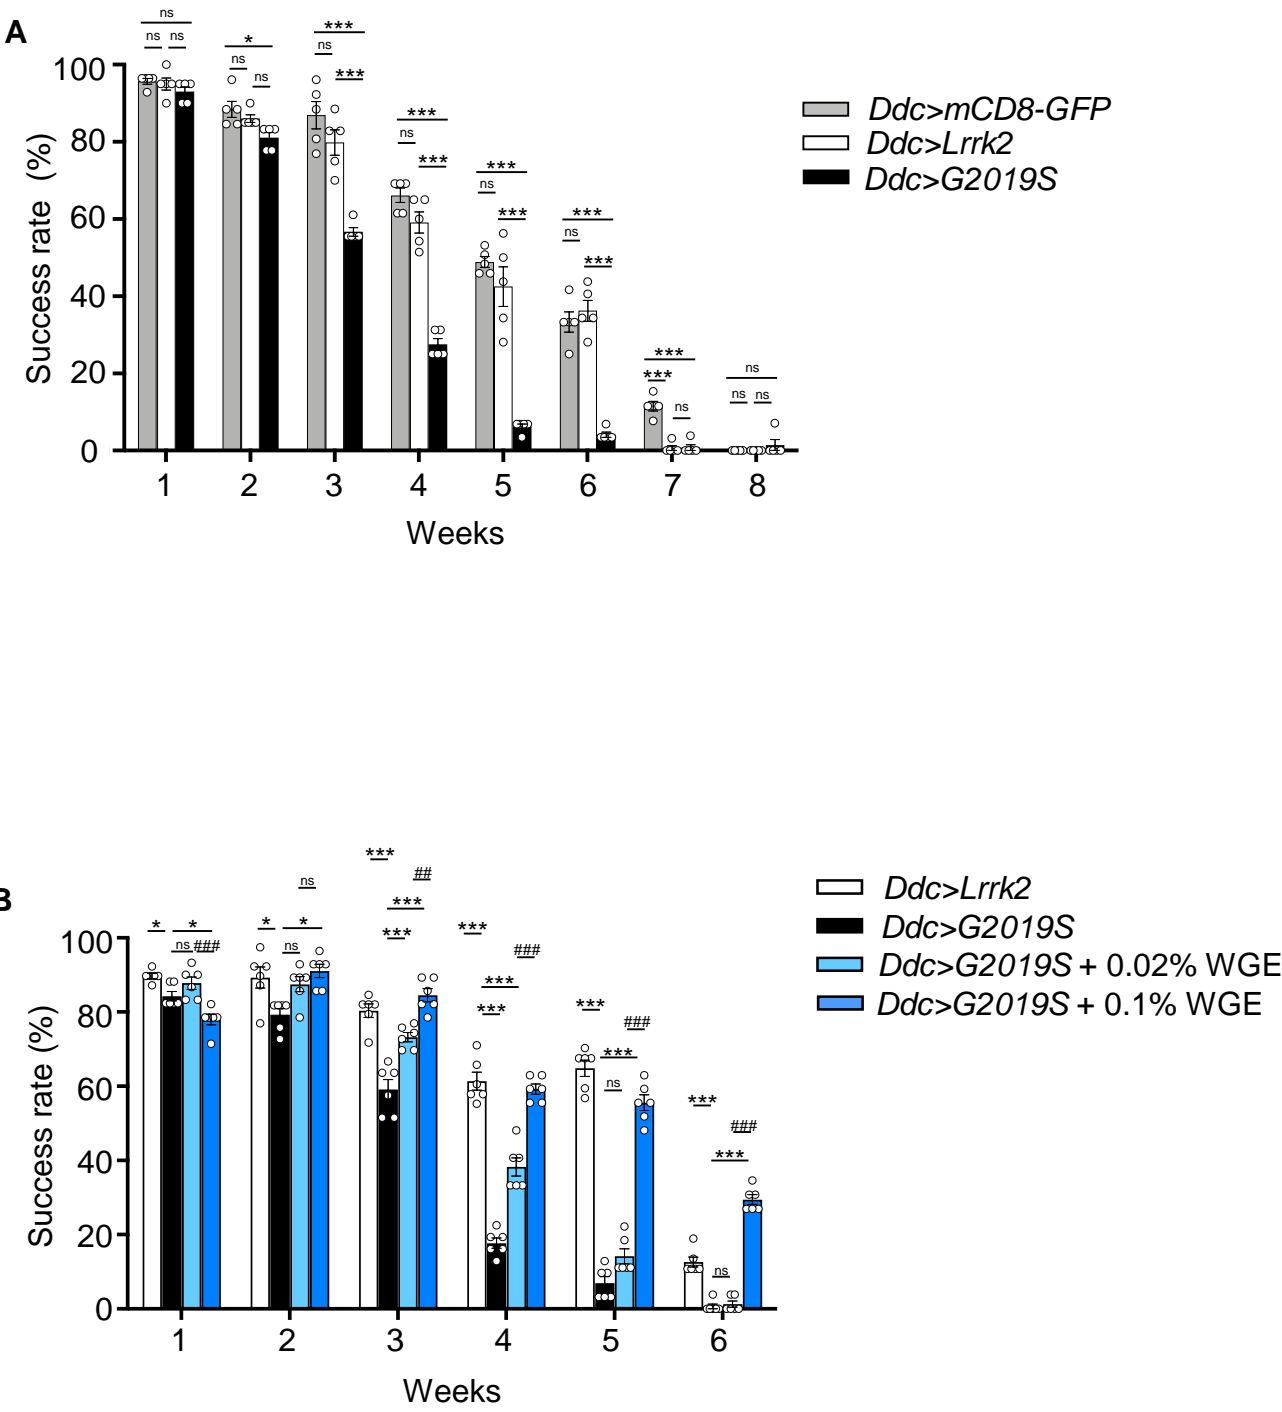

Supplement: supp [file elife-73753-supp-v1.zip]

Figure 6-figure supplement 1

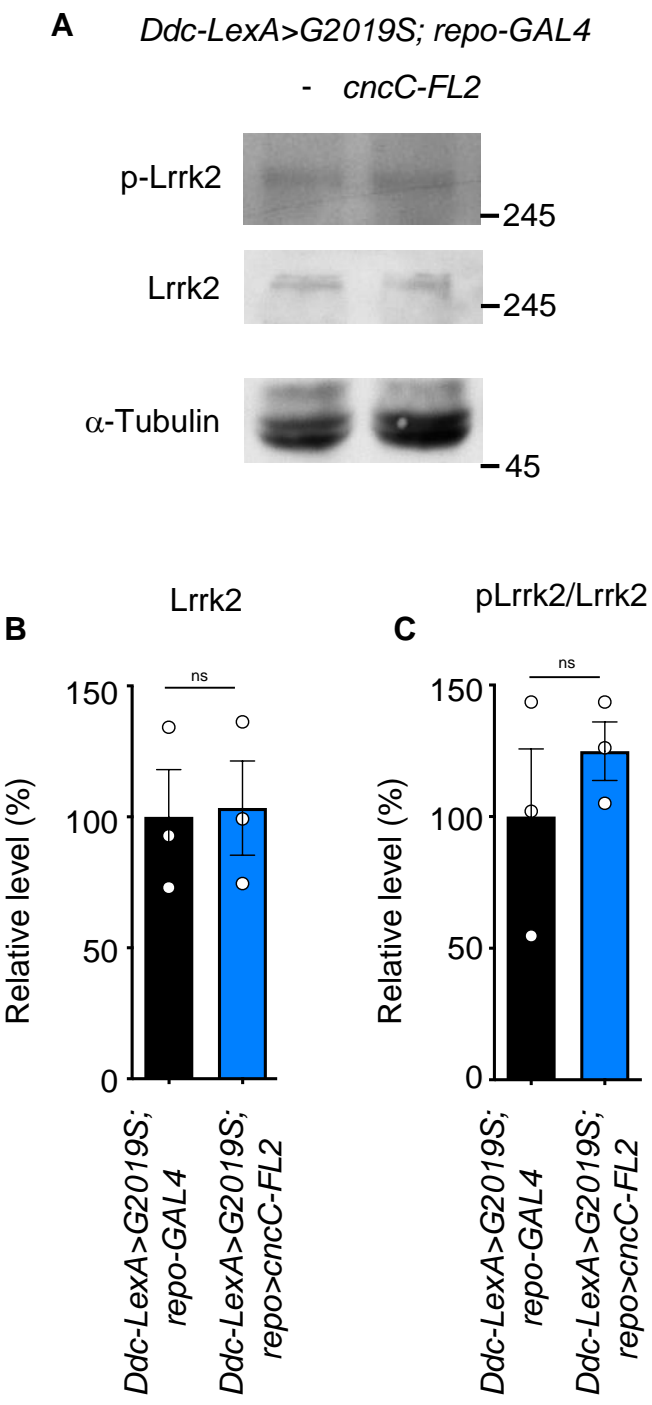

Supplement: supp [file elife-73753-supp-v1.zip]

Figure 10-figure supplement 1

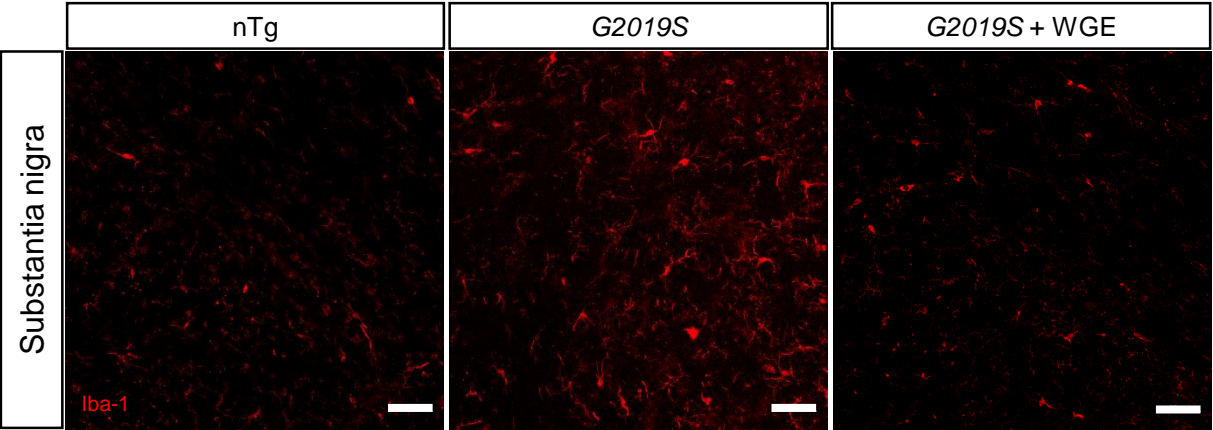

Supplement: supp [file elife-73753-supp-v1.zip]

Figure 5-figure supplement 2

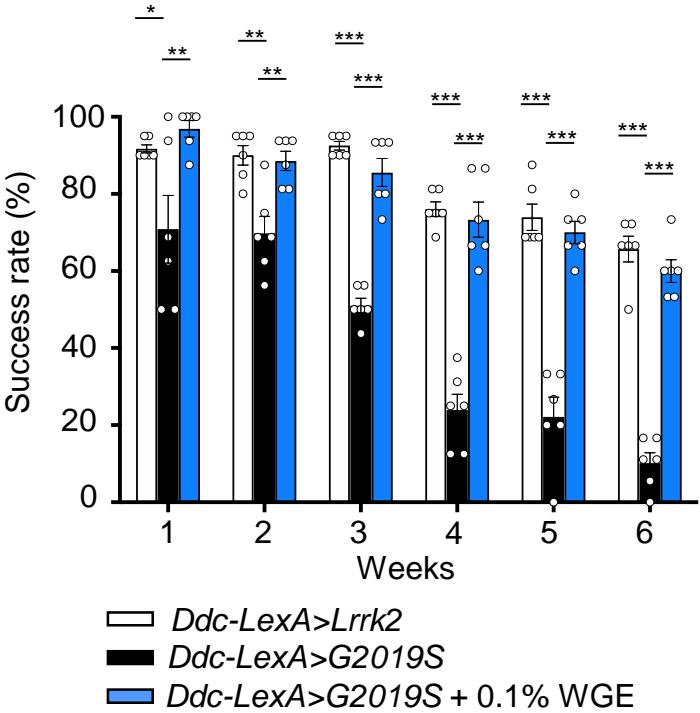

Supplement: supp [file elife-73753-supp-v1.zip]

Figure 5-figure supplement 1

A

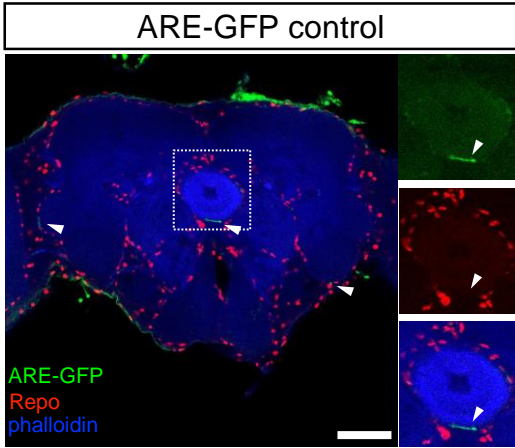

B

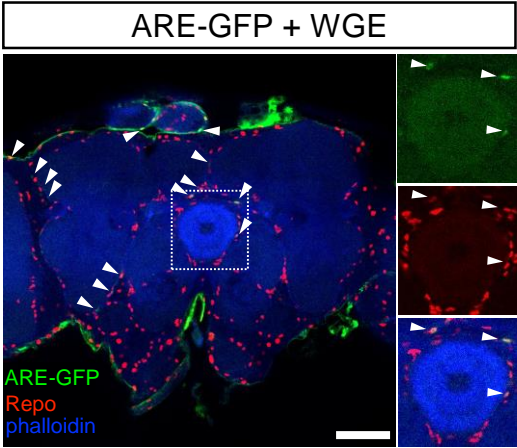

Supplement: supp [file elife-73753-supp-v1.zip]

Figure 3-figure supplement 1

A

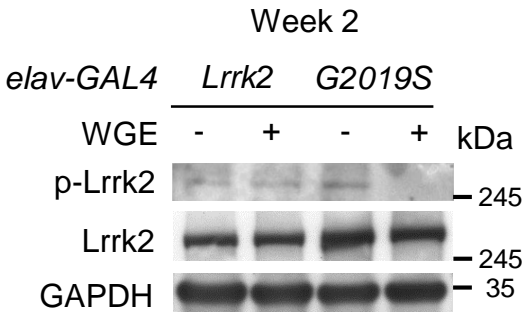

B

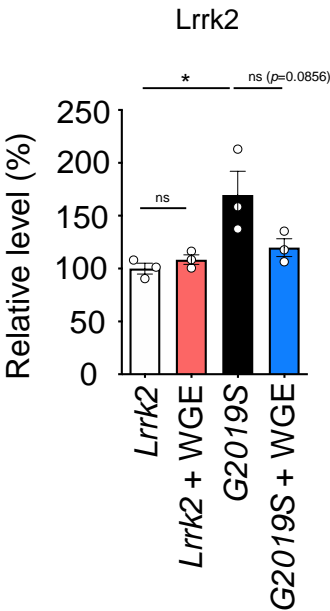

C

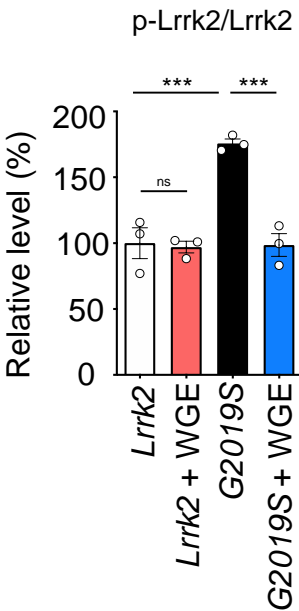

Supplement: supp [file elife-73753-supp-v1.zip]

Figure 7-figure supplement 1

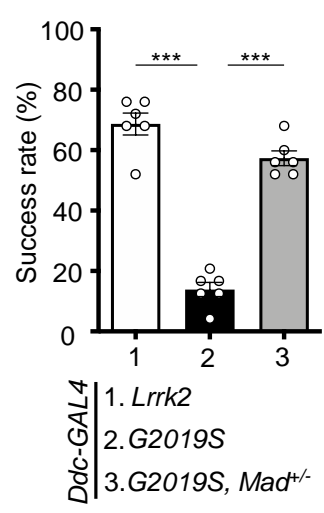

Supplement: supp [file elife-73753-supp-v1.zip]

Figure 2-figure supplement 1

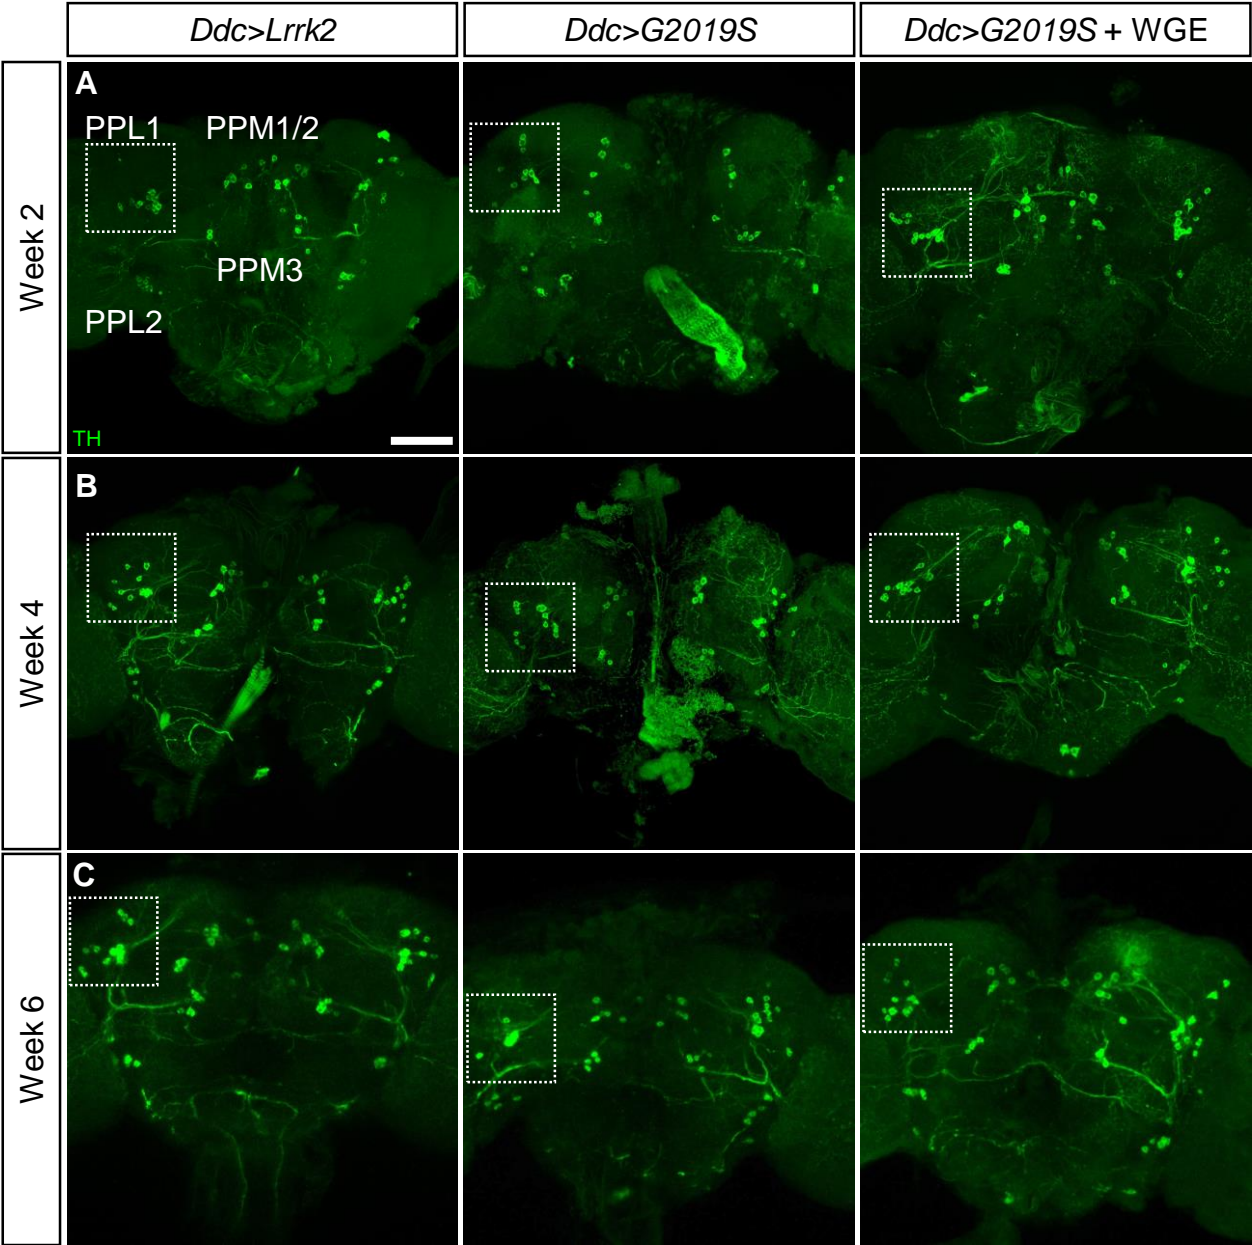

Supplement: supp [file elife-73753-supp-v1.zip]

Figure 6-figure supplement 2

**A**

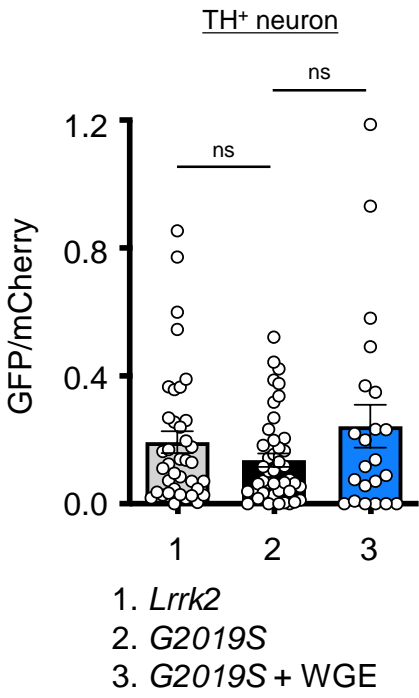

**B**

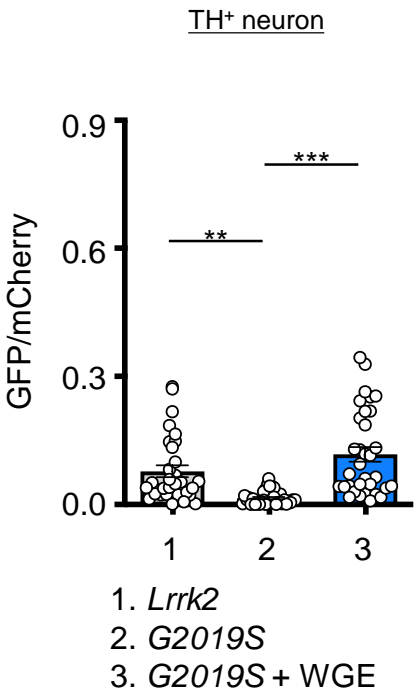

Supplement: supp [file elife-73753-supp-v1.zip]
